# Supplementary material
Source: Royal Society of Chemistry journal article supplement (doi:10.1039/d6ob00512h)

# Supporting Information

## Palladium-Catalyzed Migratory Allylic Sulfonylation of Allylic Alcohols Using Sulfonyl Hydrazides

Xianzhi Yang<sup>1</sup>, Dan Zhao<sup>2</sup>, Yu Liu<sup>1,\*</sup> and Can Zhu<sup>2,\*</sup>

<sup>1</sup>College of Chemistry and Life Science, Advanced Institute of Materials Science, Changchun University of Technology, Changchun 130012, China

<sup>2</sup>Research Center for Molecular Recognition and Synthesis, State Key Laboratory of Green Chemical Synthesis and Conversion, Department of Chemistry, Fudan University, 2005 Songhu Road, Shanghai 200438, China

\*Email: zhucan@fudan.edu.cn (Can Zhu); yuliu@ccut.edu.cn (Yu Liu)

### Table of contents

|                                                                             |     |
|-----------------------------------------------------------------------------|-----|
| <b>General information</b> .....                                            | S1  |
| <b>Preparation of starting materials</b> .....                              | S2  |
| <b>Optimization of the reaction conditions</b> .....                        | S4  |
| <b>General procedure for the hydrosulfonylation reaction</b> .....          | S7  |
| <b>Deuterium labeling experiments</b> .....                                 | S22 |
| <b>References</b> .....                                                     | S23 |
| <b><sup>1</sup>H NMR and <sup>13</sup>C NMR spectra for compounds</b> ..... | S24 |

## General information

Unless otherwise noted, all reactions were carried out in standard Schlenk techniques with magnetic stirring bar. Materials obtained from commercial suppliers were used directly without further purification.  $^1\text{H}$  NMR spectra were recorded on a BRUKER 400 (400 MHz) spectrometer in  $\text{CDCl}_3$ . Chemical shifts are reported in ppm, using the residual solvent peak in  $\text{CDCl}_3$  ( $\text{H} = 7.26$ ) as internal standard. Data are reported as follows: chemical shift, multiplicity (s = singlet, d = doublet, dd = doublet of doublet, t = triplet, q = quartet, m = multiplet), coupling constants (Hz), and integration.  $^{13}\text{C}$  NMR spectra were recorded on a BRUKER 400 (100 MHz) spectrometer in  $\text{CDCl}_3$  with complete proton decoupling. Chemical shifts are reported in ppm with the deuterium solvent as the internal standard ( $\text{CDCl}_3$ : 77.0 ppm). HRMS were recorded using EI and ESI techniques.

Anhydrous tetrahydrofuran (THF), toluene, acetonitrile and dichloromethane (DCM) were obtained from solvent purification system. Unless otherwise noted, analytical grade solvents and commercially available reagents were used directly.

Reactions were monitored by thin layer chromatography (TLC) using pre-coated silica gel plates. Flash column chromatography was performed on silica gel 60 (particle size 300-400 mesh ASTM, purchased from Yantai, China).

## Preparation of starting materials

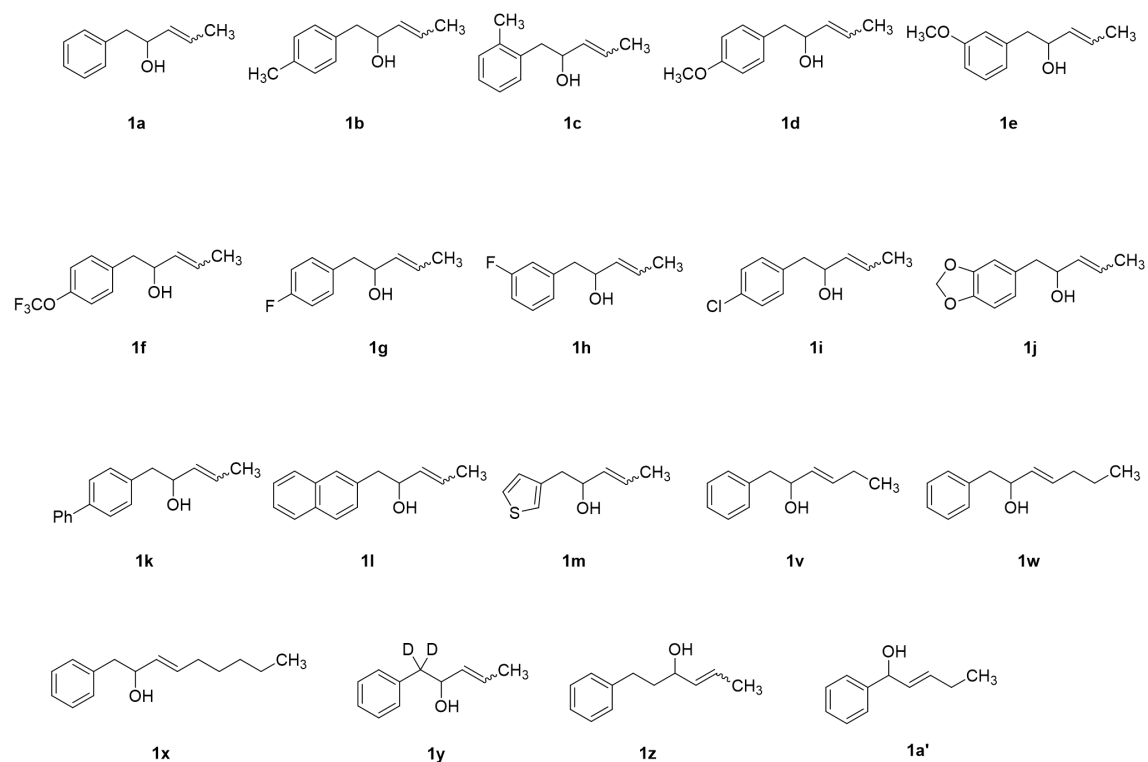

**1a, 1a', 1b, 1c, 1d, 1e, 1f, 1g, 1h, 1i, 1j, 1k, 1l, 1m, 1n, 1o, 1p, 1q, 1r, 1s, 1t, 1u, 1v, 1w, 1x, 1y and 1z** are known compounds and prepared according to our previous work.<sup>[1]</sup>

### Synthesis of 3-en-2-ol (**1a-1z**)

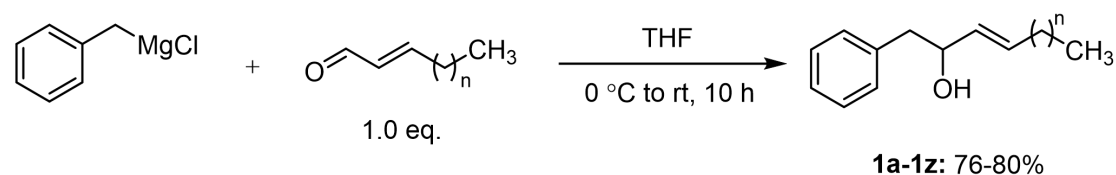

To a solution of aldehyde (5 mmol) in dry THF (20 mL) under N<sub>2</sub> at 0 °C was added the benzyl magnesium chloride (5 mL, 5 mmol, 1.0 M in THF). Then reaction mixture was allowed to gradually warm to room temperature, and stirred for additional 10 h. After completion, the reaction was quenched by with saturated NH<sub>4</sub>Cl (aq.) and diluted with EtOAc (10 mL). The organic layer was separated and the aqueous layer was extracted with EtOAc (10 mL×3). The combined organic layers were washed with brine (10 mL), dried over Na<sub>2</sub>SO<sub>4</sub>, and concentrated in

vacuo. The crude product was purified by column chromatography (eluent: petroleum ether/ethyl acetate = 40/1) gave the desired products.

*Synthesis of Sulfonyl Hydrazides*

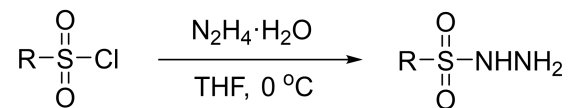

Sulfonyl hydrazides were prepared according to reported literature procedure.<sup>[2]</sup> To a solution of sulfonyl chloride (3.0 mmol) in THF (15 mL) was added dropwise hydrazine monohydrate (375 mg, 7.5 mmol) under nitrogen at 0 °C. After being vigorously stirring for 30 min at 0 °C, the reaction mixture was added ethyl acetate (3 × 20 mL), and washed with saturated brine (3 × 10 mL). The organic layers were separated, combined, and dried over sodium sulfate. After filtration, the mixture was concentrated and added to hexane (12 mL) over 5 min. The mixture was filtered, and the collected solid was dried in vacuum.

## Optimization of the reaction conditions

**Table S1.** Screening of palladium sources

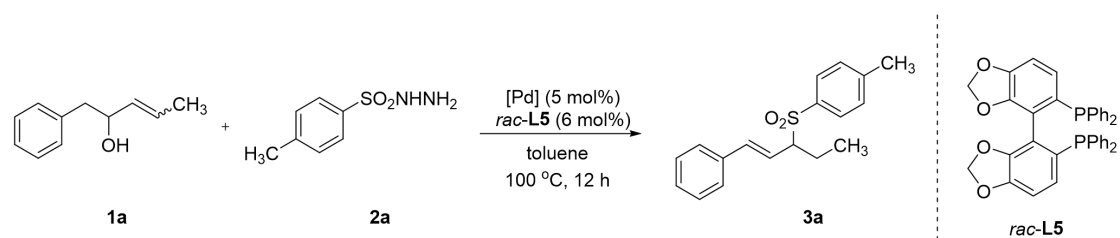

| Entry | [Pd]                                                 | Yield of <b>3a</b> (%) <sup>a</sup> |
|-------|------------------------------------------------------|-------------------------------------|
| 1     | Pd <sub>2</sub> (dba) <sub>3</sub>                   | 20                                  |
| 2     | Pd(dba) <sub>2</sub>                                 | 20                                  |
| 3     | Pd <sub>2</sub> (allyl) <sub>2</sub> Cl <sub>2</sub> | 17                                  |
| 4     | Pd(TFA) <sub>2</sub>                                 | 36                                  |
| 5     | PdCl <sub>2</sub>                                    | 20                                  |
| 6     | Pd(CN) <sub>2</sub> Cl <sub>2</sub>                  | N.D.                                |
| 7     | Pd(dppf)Cl <sub>2</sub>                              | N.D.                                |
| 8     | Pd(OAc) <sub>2</sub>                                 | 30                                  |
| 9     | Pd(PPh <sub>3</sub> ) <sub>2</sub> Cl <sub>2</sub>   | 14                                  |
| 10    | Pd(PPh <sub>3</sub> ) <sub>4</sub>                   | trace                               |

Reaction conditions: the reaction was carried out with **1a** (0.20 mmol), **2a** (0.40 mmol), [Pd] (5 mol%), and *rac*-L5 (6 mol%) in toluene (1.0 mL) at 100 °C for 12 h. <sup>a</sup>Yields were determined by <sup>1</sup>H NMR analysis using CH<sub>2</sub>Br<sub>2</sub> as the internal standard.

**Table S2.** Screening of the ratio of **1a** to **2a**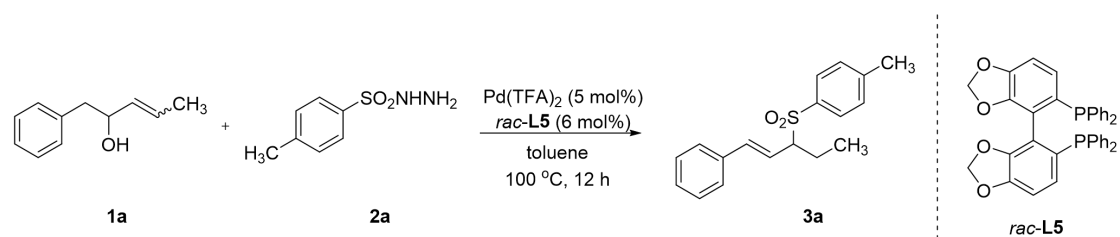

| Entry | <b>1a</b> (mmol) | <b>2a</b> (mmol) | Yield of <b>3a</b> (%) <sup>a</sup> |
|-------|------------------|------------------|-------------------------------------|
| 1     | 2.0              | 4.0              | 36                                  |
| 2     | 3.0              | 2.0              | 63                                  |
| 3     | 4.0              | 2.0              | 72                                  |
| 4     | 5.0              | 2.0              | 70                                  |

Reaction conditions: the reaction was carried out with [Pd] (5 mol%), and *rac*-L5 (6 mol%) in toluene (1.0 mL) at 100 °C for 12 h. <sup>a</sup>Yields were determined by <sup>1</sup>H NMR analysis using CH<sub>2</sub>Br<sub>2</sub> as the internal standard.

**Table S3.** Screening of ligands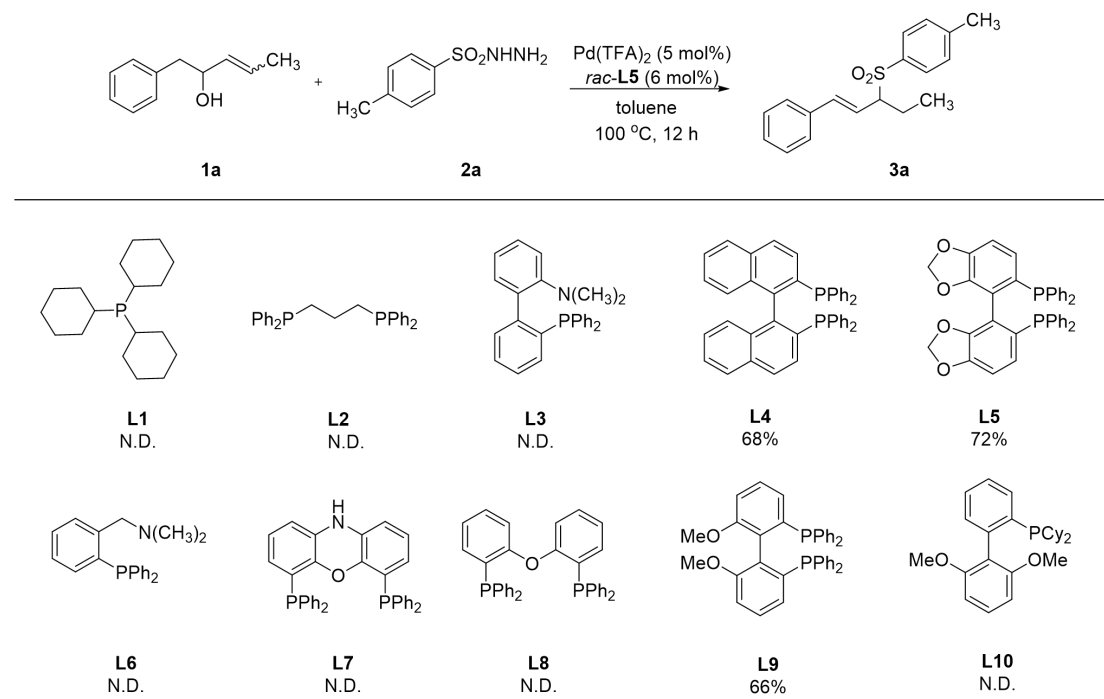

Reaction conditions: the reaction was carried out with Pd(TFA)<sub>2</sub> (5 mol%), and ligand (6 mol%) in toluene (1.0 mL) at 100 °C for 12 h. Yields were determined by <sup>1</sup>H NMR analysis using CH<sub>2</sub>Br<sub>2</sub> as

the internal standard.

**Table S4.** Optimization of reaction conditions<sup>a</sup>

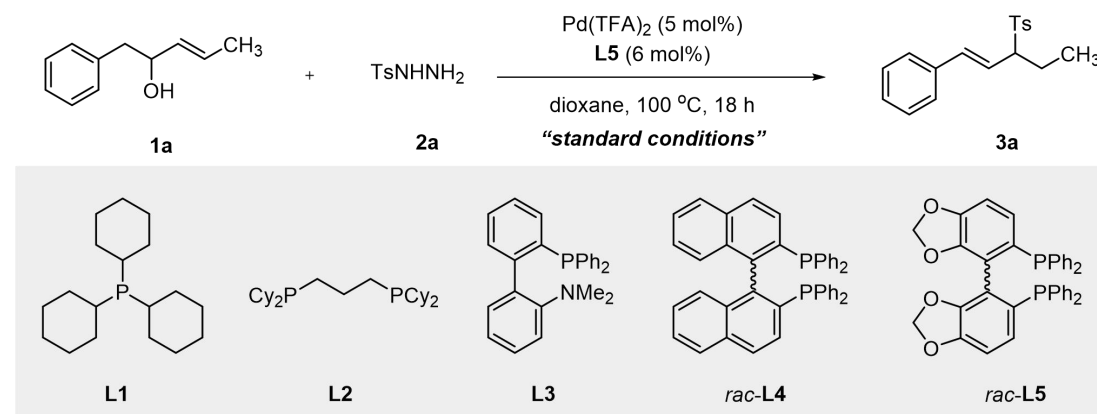

| Entry | deviation from “ <i>standard conditions</i> ” | yield of <b>3a</b> (%) <sup>b</sup> |
|-------|-----------------------------------------------|-------------------------------------|
| 1     | none                                          | 84 (81)                             |
| 2     | <b>L1</b> instead of <b>L5</b>                | N.D.                                |
| 3     | <b>L2</b> instead of <b>L5</b>                | N.D.                                |
| 4     | <b>L3</b> instead of <b>L5</b>                | N.D.                                |
| 5     | <b>L4</b> instead of <b>L5</b>                | 70                                  |
| 6     | 70 °C instead of 100 °C                       | 22                                  |
| 7     | 80 °C instead of 100 °C                       | 70                                  |
| 8     | DCE instead of dioxane                        | 36                                  |
| 9     | <sup>n</sup> hexane instead of dioxane        | 38                                  |
| 10    | DME instead of dioxane                        | 66                                  |
| 11    | toluene instead of dioxane                    | 80                                  |

<sup>a</sup>Unless otherwise noted, the reaction was carried out with **1a** (0.40 mmol), **2a** (0.20 mmol), Pd(TFA)<sub>2</sub> (5 mol%), and ligand (6 mol%) in indicated solvent (1.0 mL) at 100 °C for 18 h. <sup>b</sup>Yields were determined by <sup>1</sup>H NMR analysis using CH<sub>2</sub>Br<sub>2</sub> as the internal standard, and value in parentheses is the isolated yield.

## General procedure for the palladium-catalyzed migratory allylic sulfonylation of allylic alcohols

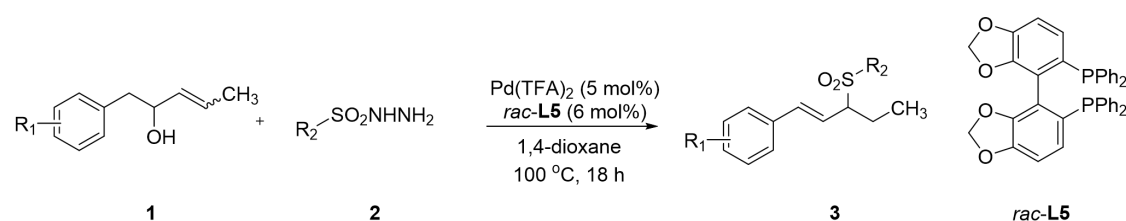

Under a nitrogen atmosphere, to a mixture of Pd(TFA)<sub>2</sub> (3.3 mg, 0.01 mmol), *rac*-L5 (6.7 mg, 0.012 mmol), and sulfonyl hydrazide (0.2 mmol) was added a solution of allylic alcohol **1** (0.4 mmol) in 1,4-dioxane (1.0 mL). The reaction was sealed and stirred at 100 °C for 18 h. Subsequently, the reaction was cooled down to room temperature, and the mixture was evaporated and purified via column chromatography on silica gel (eluent: petroleum ether/ethyl acetate) to afford desired product.

*(E)*-1-Methyl-4-((1-phenylpent-1-en-3-yl)sulfonyl)benzene (**3a**, yxz-4-70)<sup>[3]</sup>

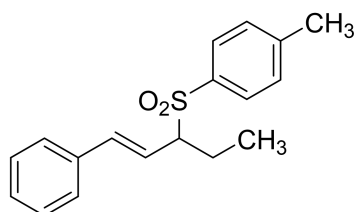

**3a**

83% isolated yield from **1a** (eluent: petroleum ether/ethyl acetate = 30/1), colorless oil; <sup>1</sup>H NMR (400 MHz, Chloroform-*d*) δ 7.70 (d, *J* = 8.3 Hz, 2H), 7.36-7.20 (m, 7H), 6.31 (d, *J* = 15.8 Hz, 1H), 5.90 (dd, *J* = 15.9, 9.4 Hz, 1H), 3.57-3.51 (m, 1H), 2.41 (s, 3H), 2.33-2.18 (m, 1H), 1.84-1.68 (m, 1H), 0.98 (t, *J* = 7.4 Hz, 3H); <sup>13</sup>C NMR (100 MHz, Chloroform-*d*) δ 144.5, 138.0, 135.9, 134.6, 129.4, 129.1, 128.6, 128.3, 126.5, 121.1, 71.1, 21.6, 21.0, 11.3; HRMS (ESI) *m/z* calculated for C<sub>18</sub>H<sub>20</sub>O<sub>2</sub>SN<sup>+</sup> [M+Na]<sup>+</sup>: 323.1076, found: 323.1076.

*(E)*-1-Methyl-4-((1-(*p*-tolyl)pent-1-en-3-yl)sulfonyl)benzene (**3b**, yxz-4-75)

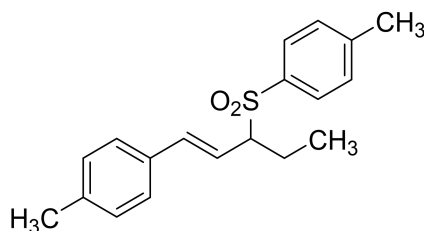

**3b**

85% isolated yield from **1b** (eluent: petroleum ether/ethyl acetate = 30/1), colorless oil;  $^1\text{H}$  NMR (400 MHz, Chloroform-*d*)  $\delta$  7.70 (d,  $J = 8.3$  Hz, 2H), 7.28 (d,  $J = 8.0$  Hz, 2H), 7.22-7.05 (m, 4H), 6.27 (d,  $J = 15.8$  Hz, 1H), 5.84 (dd,  $J = 15.8, 9.4$  Hz, 1H), 3.55-3.49 (m, 1H), 2.41 (s, 3H), 2.33 (s, 3H), 2.30-2.19 (m, 1H), 1.81-1.68 (m, 1H), 0.98 (t,  $J = 7.5$  Hz, 3H);  $^{13}\text{C}$  NMR (100 MHz, Chloroform-*d*)  $\delta$  144.4, 138.3, 137.9, 134.7, 133.2, 129.4, 129.3, 129.2, 126.4, 120.0, 71.1, 21.6, 21.2, 21.0, 11.3; HRMS (ESI)  $m/z$  calculated for  $\text{C}_{19}\text{H}_{26}\text{NO}_2\text{S}^+$   $[\text{M}+\text{NH}_4]^+$ : 332.1679, found: 332.1684.

*(E)*-1-Methyl-2-(3-tosylpent-1-en-1-yl)benzene (**3c**, yxz-4-74)

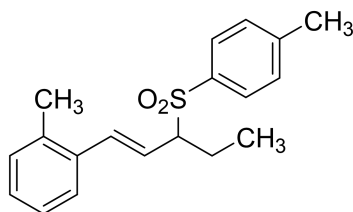

**3c**

80% isolated yield from **1c** (eluent: petroleum ether/ethyl acetate = 30/1), colorless oil;  $^1\text{H}$  NMR (400 MHz, Chloroform-*d*)  $\delta$  7.72 (d,  $J = 8.3$  Hz, 2H), 7.42-7.26 (m, 3H), 7.22-7.12 (m, 2H), 7.12-7.07 (m, 1H), 6.48 (d,  $J = 15.7$  Hz, 1H), 5.77 (dd,  $J = 15.7, 9.5$  Hz, 1H), 3.60-3.54 (m, 1H), 2.42 (s, 3H), 2.36-2.22 (m, 1H), 2.12 (s, 3H), 1.85-1.74 (m, 1H), 1.01 (t,  $J = 7.5$  Hz, 3H);  $^{13}\text{C}$  NMR (100 MHz, Chloroform-*d*)  $\delta$  144.5, 136.2, 135.5, 135.2, 134.8, 130.2, 129.4, 129.2, 128.2, 126.2, 125.8, 122.7, 71.3, 21.6, 20.8, 19.4, 11.4; HRMS (ESI)  $m/z$  calculated for  $\text{C}_{19}\text{H}_{26}\text{NO}_2\text{S}^+$   $[\text{M}+\text{NH}_4]^+$ : 332.1679, found: 332.1682

*(E)*-1-Methoxy-4-(3-tosylpent-1-en-1-yl)benzene (**3d**, yxz-4-76)

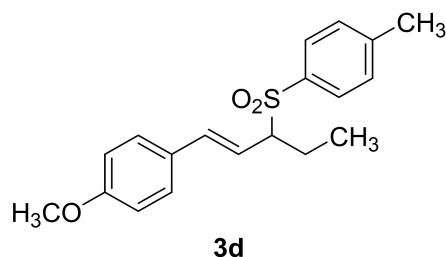

79% isolated yield from **1d** (eluent: petroleum ether/ethyl acetate = 20/1), colorless oil;  $^1\text{H}$  NMR (400 MHz, Chloroform-*d*)  $\delta$  7.70 (d,  $J = 8.3$  Hz, 2H), 7.28 (d,  $J = 8.0$  Hz, 2H), 7.22 (d,  $J = 8.7$  Hz, 2H), 6.84 (d,  $J = 8.7$  Hz, 2H), 6.25 (d,  $J = 15.8$  Hz, 1H), 5.74 (dd,  $J = 15.8, 9.4$  Hz, 1H), 3.80 (s, 3H), 3.54-3.48 (m, 1H), 2.41 (s, 3H), 2.29-2.17 (m, 1H), 1.82-1.69 (m, 1H), 0.97 (t,  $J = 7.5$  Hz, 3H);  $^{13}\text{C}$  NMR (100 MHz, Chloroform-*d*)  $\delta$  159.7, 144.4, 137.5, 134.7, 129.4, 129.2, 128.7, 127.8, 118.6, 114.0, 71.2, 55.3, 21.6, 21.0, 11.3; HRMS (ESI)  $m/z$  calculated for  $\text{C}_{19}\text{H}_{26}\text{NO}_3\text{S}^+$   $[\text{M}+\text{NH}_4]^+$ : 348.1628, found: 348.1626.

*(E)*-1-Methoxy-3-(3-tosylpent-1-en-1-yl)benzene (**3e**, yxz-4-80)

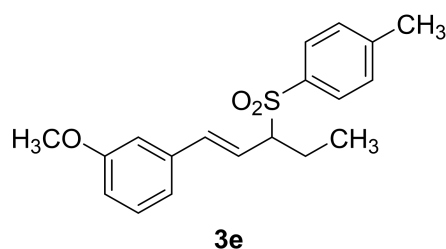

71% isolated yield from **1e** (eluent: petroleum ether/ethyl acetate = 20/1), colorless oil;  $^1\text{H}$  NMR (400 MHz, Chloroform-*d*)  $\delta$  7.70 (d,  $J = 8.3$  Hz, 2H), 7.29 (d,  $J = 8.0$  Hz, 2H), 7.22 (t,  $J = 7.7$  Hz, 1H), 6.88-6.81 (m, 3H), 6.28 (d,  $J = 15.8$  Hz, 1H), 5.90 (dd,  $J = 15.8, 9.4$  Hz, 1H), 3.81 (s, 3H), 3.56-3.50 (m, 1H), 2.42 (s, 3H), 2.30-2.20 (m, 1H), 1.81-1.72 (m, 1H), 0.98 (t,  $J = 7.5$  Hz, 3H);  $^{13}\text{C}$  NMR (100 MHz, Chloroform-*d*)  $\delta$  159.8, 144.5, 138.0, 137.3, 134.6, 129.6, 129.4, 129.2, 121.4, 119.2, 113.9, 111.8, 71.1, 55.2, 21.6, 21.0, 11.3; HRMS (ESI)  $m/z$  calculated for  $\text{C}_{19}\text{H}_{26}\text{NO}_3\text{S}^+$   $[\text{M}+\text{NH}_4]^+$ : 348.1628, found: 348.1635.

*(E)*-1-Methyl-4-((1-(4-(trifluoromethoxy)phenyl)pent-1-en-3-yl)sulfonyl)benzene (**3f**, yxz-4-77)

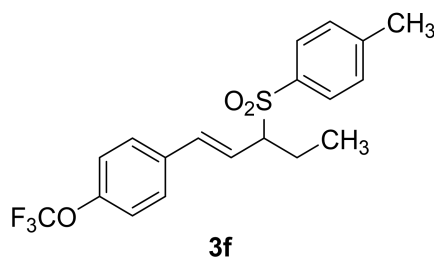

60% isolated yield from **1f** (eluent: petroleum ether/ethyl acetate = 20/1), colorless oil;  $^1\text{H}$  NMR (400 MHz, Chloroform-*d*)  $\delta$  7.70 (d,  $J$  = 8.1 Hz, 2H), 7.30 (d,  $J$  = 8.3 Hz, 4H), 7.16 (d,  $J$  = 8.4 Hz, 2H), 6.32 (d,  $J$  = 15.8 Hz, 1H), 5.89 (dd,  $J$  = 15.8, 9.4 Hz, 1H), 3.57-3.51 (m, 1H), 2.43 (s, 3H), 2.28-2.18 (m, 1H), 1.81-1.70 (m, 1H), 0.98 (t,  $J$  = 7.4 Hz, 3H);  $^{19}\text{F}$  NMR (376 MHz, Chloroform-*d*)  $\delta$  -57.8;  $^{13}\text{C}$  NMR (100 MHz, Chloroform-*d*)  $\delta$  149.0, 144.6, 136.5, 134.6, 129.5, 129.3, 129.1, 127.8, 122.2, 121.1, 120.4 (q,  $J$  = 255.7 Hz), 71.0, 21.6, 21.1, 11.3; HRMS (ESI)  $m/z$  calculated for  $\text{C}_{19}\text{H}_{23}\text{F}_3\text{NO}_3\text{S}^+$   $[\text{M}+\text{NH}_4]^+$ : 402.1345, found: 402.1351.

*(E)*-1-Fluoro-4-(3-tosylpent-1-en-1-yl)benzene (**3g**, yxz-4-86)

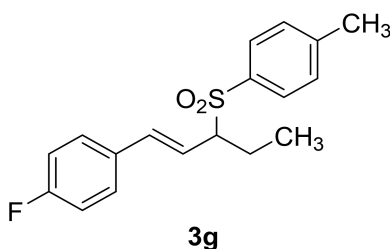

60% isolated yield from **1g** (eluent: petroleum ether/ethyl acetate = 20/1), colorless oil;  $^1\text{H}$  NMR (400 MHz, Chloroform-*d*)  $\delta$  7.70 (d,  $J$  = 8.3 Hz, 2H), 7.31-7.24 (m, 4H), 7.02-6.98 (m, 2H), 6.29 (d,  $J$  = 15.9 Hz, 1H), 5.82 (dd,  $J$  = 15.9, 9.4 Hz, 1H), 3.56-3.50 (m, 1H), 2.42 (s, 3H), 2.26-2.19 (m, 1H), 1.79-1.69 (m, 1H), 0.97 (t,  $J$  = 7.5 Hz, 3H);  $^{19}\text{F}$  NMR (376 MHz, Chloroform-*d*)  $\delta$  -113.1;  $^{13}\text{C}$  NMR (100 MHz, Chloroform-*d*)  $\delta$  162.68 (d,  $J$  = 246.8 Hz), 144.5, 136.9, 134.6, 132.1, 129.3 (d,  $J$  = 3.1 Hz), 128.2, 128.1 (d,  $J$  = 7.8 Hz), 115.59 (d,  $J$  = 22.4 Hz), 71.0, 21.6, 21.1, 11.3; HRMS (ESI)  $m/z$  calculated for  $\text{C}_{18}\text{H}_{23}\text{FNO}_2\text{S}^+$   $[\text{M}+\text{NH}_4]^+$ : 336.1428, found: 336.1434.

*(E)*-1-Fluoro-3-(3-tosylpent-1-en-1-yl)benzene (**3h**, yxz-4-94)

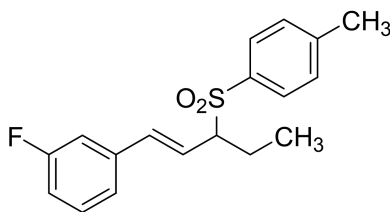

**3h**

57% isolated yield from **1h** (eluent: petroleum ether/ethyl acetate = 20/1), colorless oil;  $^1\text{H}$  NMR (400 MHz, Chloroform-*d*)  $\delta$  7.70 (d,  $J = 8.3$  Hz, 2H), 7.31-7.24 (m, 3H), 7.05 (d,  $J = 7.7$  Hz, 1H), 6.98-6.93 (m, 2H), 6.29 (d,  $J = 15.8$  Hz, 1H), 5.91 (dd,  $J = 15.8, 9.4$  Hz, 1H), 3.57-3.51 (m, 1H), 2.43 (s, 3H), 2.26-2.21 (m, 1H), 1.79-1.72 (m, 1H), 0.98 (t,  $J = 7.5$  Hz, 3H);  $^{19}\text{F}$  NMR (376 MHz, Chloroform-*d*)  $\delta$  -113.1;  $^{13}\text{C}$  NMR (100 MHz, Chloroform-*d*)  $\delta$  163.0 (d,  $J = 243.8$  Hz), 144.6, 138.2 (d,  $J = 7.4$  Hz), 136.9 (d,  $J = 1.8$  Hz), 134.6, 130.2 (d,  $J = 7.1$  Hz), 129.5, 129.2, 122.7, 122.4 (d,  $J = 2.4$  Hz), 115.2 (d,  $J = 21.6$  Hz), 113.0 (d,  $J = 21.4$  Hz), 70.9, 21.6, 21.1, 11.3; HRMS (ESI)  $m/z$  calculated for  $\text{C}_{18}\text{H}_{23}\text{FNO}_2\text{S}^+ [\text{M}+\text{NH}_4]^+$ : 336.1428, found: 336.1434.

*(E)*-1-Chloro-4-(3-tosylpent-1-en-1-yl)benzene (**3i**, yxz-4-84)

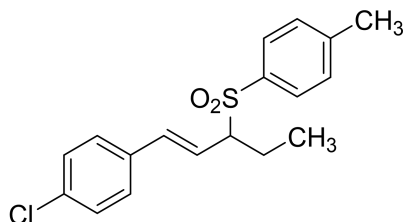

**3i**

65% isolated yield from **1i** (eluent: petroleum ether/ethyl acetate = 20/1), colorless oil;  $^1\text{H}$  NMR (400 MHz, Chloroform-*d*)  $\delta$  7.69 (d,  $J = 8.3$  Hz, 2H), 7.30-7.26 (m, 4H), 7.21 (d,  $J = 8.5$  Hz, 2H), 6.27 (d,  $J = 15.9$  Hz, 1H), 5.88 (dd,  $J = 15.9, 9.4$  Hz, 1H), 3.56-3.50 (m, 1H), 2.42 (s, 3H), 2.28-2.18 (m, 1H), 1.79-1.71 (m, 1H), 0.97 (t,  $J = 7.4$  Hz, 3H);  $^{13}\text{C}$  NMR (100 MHz, Chloroform-*d*)  $\delta$  144.6, 136.8, 134.6, 134.4, 134.1, 129.5, 129.1, 128.8, 127.7, 121.8, 71.0, 21.6, 21.0, 11.3; HRMS (ESI)  $m/z$  calculated for  $\text{C}_{18}\text{H}_{23}^{35}\text{ClNO}_2\text{S}^+ [\text{M}+\text{NH}_4]^+$ : 352.1133, found: 352.1138.

*(E)*-5-(3-Tosylpent-1-en-1-yl)benzo[*d*][1,3]dioxole (**3j**, yxz-4-81)

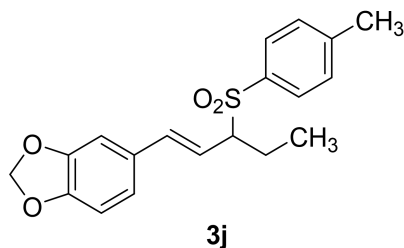

65% isolated yield from **1j** (eluent: petroleum ether/ethyl acetate = 10/1), colorless oil;  $^1\text{H}$  NMR (400 MHz, Chloroform-*d*)  $\delta$  7.70 (d,  $J = 8.3$  Hz, 2H), 7.29 (d,  $J = 8.0$  Hz, 2H), 6.83 (s, 1H), 6.75-6.68 (m, 2H), 6.22 (d,  $J = 15.8$  Hz, 1H), 5.96 (s, 2H), 5.70 (dd,  $J = 15.8, 9.4$  Hz, 1H), 3.53-3.47 (m, 1H), 2.42 (s, 3H), 2.28-2.18 (m, 1H), 1.78-1.66 (m, 1H), 0.97 (t,  $J = 7.4$  Hz, 3H);  $^{13}\text{C}$  NMR (100 MHz, Chloroform-*d*)  $\delta$  148.1, 147.8, 144.5, 137.7, 134.6, 130.4, 129.4, 129.2, 121.5, 119.1, 108.3, 105.7, 101.2, 71.1, 21.6, 21.1, 11.3; HRMS (ESI)  $m/z$  calculated for  $\text{C}_{19}\text{H}_{24}\text{NO}_4\text{S}^+$   $[\text{M}+\text{NH}_4]^+$ : 362.1421, found: 362.1424.

*(E)*-4-(3-Tosylpent-1-en-1-yl)-1,1'-biphenyl (**3k**, yxz-4-87)

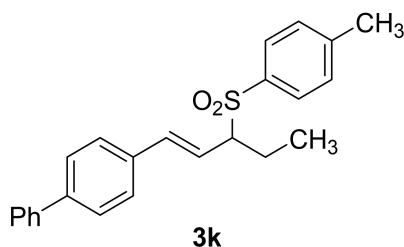

69% isolated yield from **1k** (eluent: petroleum ether/ethyl acetate = 20/1), white solid;  $^1\text{H}$  NMR (400 MHz, Chloroform-*d*)  $\delta$  7.72 (d,  $J = 8.3$  Hz, 2H), 7.60-7.53 (m, 4H), 7.46-7.25 (m, 7H), 6.35 (d,  $J = 15.8$  Hz, 1H), 5.95 (dd,  $J = 15.8, 9.4$  Hz, 1H), 3.59-3.53 (m, 1H), 2.42 (s, 3H), 2.28-2.24 (m, 1H), 1.80-1.76 (m, 1H), 1.00 (t,  $J = 7.5$  Hz, 3H);  $^{13}\text{C}$  NMR (100 MHz, Chloroform-*d*)  $\delta$  144.5, 141.1, 140.4, 137.6, 135.0, 134.7, 129.5, 129.2, 128.9, 127.5, 127.3, 127.1, 127.0, 121.2, 71.2, 21.7, 21.1, 11.4; HRMS (ESI)  $m/z$  calculated for  $\text{C}_{24}\text{H}_{28}\text{NO}_2\text{S}^+$   $[\text{M}+\text{NH}_4]^+$ : 394.1835, found: 394.1838.

*(E)*-2-(3-Tosylpent-1-en-1-yl)naphthalene (**3l**, yxz-4-83)

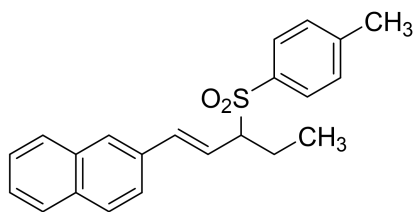

**3l**

71% isolated yield from **1l** (eluent: petroleum ether/ethyl acetate = 20/1), colorless oil;  $^1\text{H}$  NMR (400 MHz, Chloroform-*d*)  $\delta$  7.80-7.44 (m, 9H), 7.27 (d,  $J = 8.1$  Hz, 2H), 6.46 (d,  $J = 15.8$  Hz, 1H), 6.03 (dd,  $J = 15.8, 9.4$  Hz, 1H), 3.63-3.57 (m, 1H), 2.40 (s, 3H), 2.34-2.24 (m, 1H), 1.87-1.75 (m, 1H), 1.01 (t,  $J = 7.5$  Hz, 3H);  $^{13}\text{C}$  NMR (100 MHz, Chloroform-*d*)  $\delta$  144.5, 138.1, 134.6, 133.3, 133.3, 133.2, 129.4, 129.2, 128.3, 128.0, 127.7, 126.8, 126.4, 126.3, 123.3, 121.4, 71.2, 21.6, 21.0, 11.4; HRMS (ESI)  $m/z$  calculated for  $\text{C}_{22}\text{H}_{26}\text{NO}_2\text{S}^+$  [ $\text{M}+\text{NH}_4$ ] $^+$ : 368.1679, found: 368.1684.

*(E)*-3-(3-Tosylpent-1-en-1-yl)thiophene (**3m**, yxz-4-89)

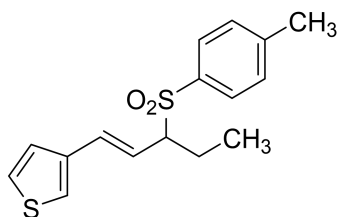

**3m**

67% isolated yield from **1m** (eluent: petroleum ether/ethyl acetate = 20/1), colorless oil;  $^1\text{H}$  NMR (400 MHz, Chloroform-*d*)  $\delta$  7.72 (d,  $J = 8.3$  Hz, 2H), 7.33-7.28 (m, 3H), 7.17 (d,  $J = 5.1$  Hz, 1H), 7.12 (d,  $J = 2.9$  Hz, 1H), 6.37 (d,  $J = 15.8$  Hz, 1H), 5.76 (dd,  $J = 15.8, 9.4$  Hz, 1H), 3.54-3.48 (m, 1H), 2.44 (s, 3H), 2.29-2.19 (m, 1H), 1.80-1.68 (m, 1H), 0.99 (t,  $J = 7.5$  Hz, 3H);  $^{13}\text{C}$  NMR (100 MHz, Chloroform-*d*)  $\delta$  144.5, 138.6, 134.7, 132.1, 129.4, 129.2, 126.3, 124.8, 123.4, 120.7, 71.1, 21.6, 21.1, 11.3; HRMS (ESI)  $m/z$  calculated for  $\text{C}_{16}\text{H}_{22}\text{NO}_2\text{S}_2^+$  [ $\text{M}+\text{NH}_4$ ] $^+$ : 324.1086, found: 324.1090.

*(E)*-((1-Phenylpent-1-en-3-yl)sulfonyl)benzene (**3n**, yxz-5-9)<sup>[3]</sup>

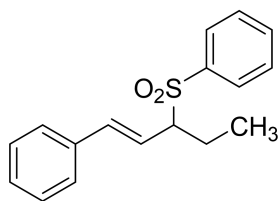

**3n**

81% isolated yield from **1a** (eluent: petroleum ether/ethyl acetate = 20/1), white solid;  $^1\text{H}$  NMR (400 MHz, Chloroform-*d*)  $\delta$  7.87-7.85 (m, 2H), 7.65-7.61 (m, 1H), 7.54-7.50 (m, 2H), 7.33-7.27 (m, 5H), 6.30 (d,  $J = 15.9$  Hz, 1H), 5.93 (dd,  $J = 15.9, 9.5$  Hz, 1H), 3.62-3.56 (m, 1H), 2.35-2.25 (m, 1H), 1.85-1.77 (m, 1H), 1.02 (t,  $J = 7.3$  Hz, 3H);  $^{13}\text{C}$  NMR (100 MHz, Chloroform-*d*)  $\delta$  138.3, 137.6, 135.8, 133.5, 129.1, 128.8, 128.6, 128.4, 126.5, 121.0, 71.1, 20.9, 11.3; HRMS (ESI)  $m/z$  calculated for  $\text{C}_{17}\text{H}_{22}\text{NO}_2\text{S}^+$  [ $\text{M}+\text{NH}_4$ ] $^+$ : 304.1366, found: 304.1371.

*(E)*-1-Methoxy-4-((1-phenylpent-1-en-3-yl)sulfonyl)benzene (**3o**, yxz-5-6)

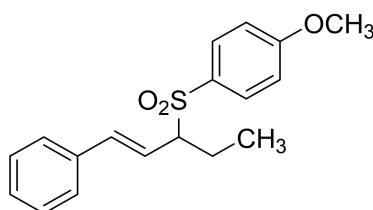

**3o**

80% isolated yield from **1a**(eluent: petroleum ether/ethyl acetate = 15/1), colorless oil;  $^1\text{H}$  NMR (400 MHz, Chloroform-*d*)  $\delta$  7.77 (d,  $J = 8.9$  Hz, 2H), 7.36-7.29 (m, 5H), 6.97 (d,  $J = 8.9$  Hz, 2H), 6.34 (d,  $J = 15.9$  Hz, 1H), 5.93 (dd,  $J = 15.9, 9.4$  Hz, 1H), 3.88 (s, 3H), 3.58-3.52 (m, 1H), 2.31-2.23 (m, 1H), 1.82-1.74 (m, 1H), 1.01 (t,  $J = 7.5$  Hz, 3H);  $^{13}\text{C}$  NMR (100 MHz, Chloroform-*d*)  $\delta$  163.6, 138.0, 135.9, 131.3, 129.1, 128.6, 128.3, 126.5, 121.3, 114.0, 71.3, 55.6, 21.1, 11.4; HRMS (ESI)  $m/z$  calculated for  $\text{C}_{18}\text{H}_{20}\text{O}_3\text{SNa}^+$  [ $\text{M}+\text{Na}$ ] $^+$ : 339.1025, found: 339.1031.

*(E)*-1-(*tert*-Butyl)-4-((1-phenylpent-1-en-3-yl)sulfonyl)benzene (**3p**, yxz-5-21)

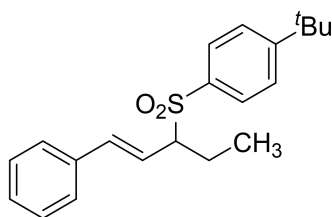

**3p**

71% isolated yield from **1a** (eluent: petroleum ether/ethyl acetate = 20/1), colorless oil;  $^1\text{H}$  NMR (400 MHz, Chloroform-*d*)  $\delta$  7.74 (d,  $J$  = 8.6 Hz, 2H), 7.49 (d,  $J$  = 8.6 Hz, 2H), 7.30-7.24 (m, 5H), 6.28 (d,  $J$  = 15.9 Hz, 1H), 5.91 (dd,  $J$  = 15.9, 9.4 Hz, 1H), 3.58-3.52 (m, 1H), 2.30-2.2 (m, 1H), 1.82-1.74 (m, 1H), 1.32 (s, 9H), 0.98 (t,  $J$  = 7.5 Hz, 3H);  $^{13}\text{C}$  NMR (100 MHz, Chloroform-*d*)  $\delta$  157.4, 138.2, 135.9, 134.5, 129.0, 128.6, 128.3, 126.5, 125.8, 121.1, 71.2, 35.2, 31.0, 21.0, 11.4; HRMS (ESI)  $m/z$  calculated for  $\text{C}_{21}\text{H}_{30}\text{NO}_2\text{S}^+$  [ $\text{M}+\text{NH}_4$ ] $^+$ : 360.1992, found: 360.2000.

*(E)*-1-Fluoro-4-((1-phenylpent-1-en-3-yl)sulfonyl)benzene (**3q**, yxz-5-7) <sup>[3]</sup>

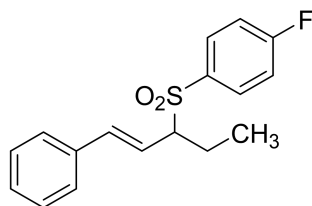

**3q**

71% isolated yield from **1a** (eluent: petroleum ether/ethyl acetate = 20/1), colorless oil;  $^1\text{H}$  NMR (400 MHz, Chloroform-*d*)  $\delta$  7.86-7.82 (m, 2H), 7.34-7.18 (m, 5H), 7.18-7.15 (m, 2H), 6.28 (d,  $J$  = 15.9 Hz, 1H), 5.90 (dd,  $J$  = 15.9, 9.4 Hz, 1H), 3.57-3.52 (m, 1H), 2.31-2.25 (m, 1H), 1.83-1.75 (m, 1H), 1.01 (t,  $J$  = 7.5 Hz, 3H);  $^{19}\text{F}$  NMR (376 MHz, Chloroform-*d*)  $\delta$  -103.7;  $^{13}\text{C}$  NMR (100 MHz, Chloroform-*d*)  $\delta$  165.7 (d,  $J$  = 253.7 Hz), 138.4, 135.6, 133.6 (d,  $J$  = 2.6 Hz), 132.0 (d,  $J$  = 9.3 Hz), 128.7, 128.5, 126.5, 120.8, 116.1 (d,  $J$  = 22.3 Hz), 71.3, 20.8, 11.3; HRMS (ESI)  $m/z$  calculated for  $\text{C}_{17}\text{H}_{21}\text{FNO}_2\text{S}^+$  [ $\text{M}+\text{NH}_4$ ] $^+$ : 322.1272, found: 322.1275.

*(E)*-1-Chloro-4-((1-phenylpent-1-en-3-yl)sulfonyl)benzene (**3r**, yxz-5-58) <sup>[3]</sup>

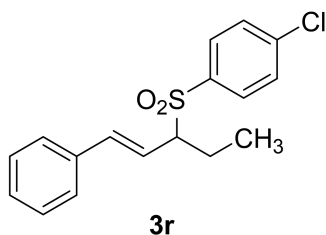

66% isolated yield from **1a** (eluent: petroleum ether/ethyl acetate = 20/1), white solid;  $^1\text{H}$  NMR (400 MHz, Chloroform-*d*)  $\delta$  7.76 (d,  $J$  = 8.4 Hz, 2H), 7.47 (d,  $J$  = 8.1 Hz, 2H), 7.34-7.29 (m, 5H), 6.31 (d,  $J$  = 15.9 Hz, 1H), 5.90 (dd,  $J$  = 15.9, 9.4 Hz, 1H), 3.59-3.53 (m, 1H), 2.30-2.23 (m, 1H), 1.84-1.72 (m, 1H), 1.00 (t,  $J$  = 7.5 Hz, 3H);  $^{13}\text{C}$  NMR (100 MHz, Chloroform-*d*)  $\delta$  140.31, 138.50, 136.06, 135.59, 130.60, 129.10, 128.67, 128.50, 126.52, 120.61, 71.15, 20.83, 11.27; HRMS (ESI)  $m/z$  calculated for  $\text{C}_{17}\text{H}_{21}^{35}\text{ClNO}_2\text{S}^+$  [ $\text{M}+\text{NH}_4$ ] $^+$ : 338.0976, found: 338.0984.

*(E)*-1-Methyl-3-((1-phenylpent-1-en-3-yl)sulfonyl)benzene (**3s**, yxz-5-23)

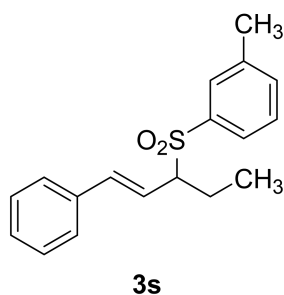

75% isolated yield from **1a** (eluent: petroleum ether/ethyl acetate = 20/1), colorless oil;  $^1\text{H}$  NMR (400 MHz, Chloroform-*d*)  $\delta$  7.64-7.61 (m, 2H), 7.42-7.35 (m, 2H), 7.33-7.24 (m, 5H), 6.28 (d,  $J$  = 15.9 Hz, 1H), 5.90 (dd,  $J$  = 15.9, 9.4 Hz, 1H), 3.58-3.52 (m, 1H), 2.35 (s, 3H), 2.29-2.22 (m, 1H), 1.82-1.76 (m, 1H), 0.99 (t,  $J$  = 7.5 Hz, 3H);  $^{13}\text{C}$  NMR (100 MHz, Chloroform-*d*)  $\delta$  139.0, 138.2, 137.4, 135.9, 134.3, 129.6, 128.6, 128.6, 128.3, 126.5, 126.3, 121.1, 71.1, 21.1, 20.9, 11.3; HRMS (ESI)  $m/z$  calculated for  $\text{C}_{18}\text{H}_{24}\text{NO}_2\text{S}^+$  [ $\text{M}+\text{NH}_4$ ] $^+$ : 318.1522, found: 318.1529.

*(E)*-1,2-Dimethyl-4-((1-phenylpent-1-en-3-yl)sulfonyl)benzene (**3t**, yxz-5-20)

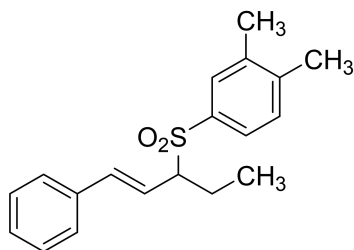

**3t**

68% isolated yield from **1a** (eluent: petroleum ether/ethyl acetate = 20/1), colorless oil;  $^1\text{H}$  NMR (400 MHz, Chloroform-*d*)  $\delta$  7.61-7.53 (m, 2H), 7.29-7.23 (m, 6H), 6.32 (d,  $J$  = 15.9 Hz, 1H), 5.90 (dd,  $J$  = 15.9, 9.4 Hz, 1H), 3.56-3.50 (m, 1H), 2.34-2.21 (m, 7H), 1.81-1.69 (m, 1H), 0.98 (t,  $J$  = 7.4 Hz, 3H);  $^{13}\text{C}$  NMR (100 MHz, Chloroform-*d*)  $\delta$  143.2, 138.0, 137.5, 136.0, 134.8, 130.0, 129.9, 128.6, 128.3, 126.7, 126.5, 121.2, 71.1, 21.0, 20.0, 19.6, 11.4; HRMS (ESI)  $m/z$  calculated for  $\text{C}_{19}\text{H}_{26}\text{NO}_2\text{S}^+$   $[\text{M}+\text{NH}_4]^+$ : 332.1679, found: 332.1686.

*(E)*-(3-(Methylsulfonyl)pent-1-en-1-yl)benzene (**3u**, yxz-5-1) <sup>[3]</sup>

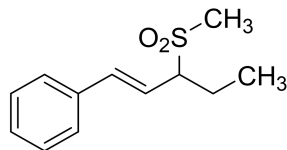

**3u**

78% isolated yield from **1a** (eluent: petroleum ether/ethyl acetate = 20/1), colorless oil;  $^1\text{H}$  NMR (400 MHz, Chloroform-*d*)  $\delta$  7.44-7.41 (m, 2H), 7.38-7.29 (m, 3H), 6.70 (d,  $J$  = 15.9 Hz, 1H), 6.13 (dd,  $J$  = 15.9, 9.7 Hz, 1H), 3.55-3.49 (m, 1H), 2.86 (s, 3H), 2.34-2.24 (m, 1H), 1.87-1.79 (m, 1H), 1.05 (t,  $J$  = 7.5 Hz, 3H);  $^{13}\text{C}$  NMR (100 MHz, Chloroform-*d*)  $\delta$  138.0, 135.5, 128.8, 128.7, 126.7, 121.8, 70.0, 38.4, 19.7, 11.2; HRMS (ESI)  $m/z$  calculated for  $\text{C}_{12}\text{H}_{16}\text{NaO}_2\text{S}^+$   $[\text{M}+\text{Na}]^+$ : 247.0763, found: 247.0766.

*(E)*-1-Methyl-4-((1-phenylhex-1-en-3-yl)sulfonyl)benzene (**3v**, yxz-4-90)

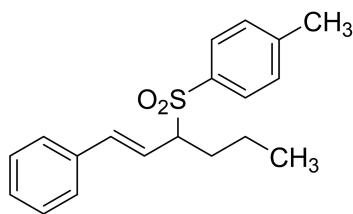

**3v**

55% isolated yield from **1v** (eluent: petroleum ether/ethyl acetate = 30/1), colorless oil;  $^1\text{H}$  NMR (400 MHz, Chloroform-*d*)  $\delta$  7.70 (d,  $J = 8.3$  Hz, 2H), 7.33-7.24 (m, 7H), 6.29 (d,  $J = 15.9$  Hz, 1H), 5.89 (dd,  $J = 15.9, 9.5$  Hz, 1H), 3.66-3.60 (m, 1H), 2.41 (s, 3H), 2.18-2.11 (m, 1H), 1.78-1.72 (m, 1H), 1.50-1.44 (m, 1H), 1.34-1.27 (m, 1H), 0.92 (t,  $J = 7.3$  Hz, 3H);  $^{13}\text{C}$  NMR (100 MHz, Chloroform-*d*)  $\delta$  144.5, 137.8, 135.9, 134.7, 129.4, 129.2, 128.6, 128.3, 126.5, 121.5, 69.4, 29.4, 21.6, 20.0, 13.6; HRMS (ESI)  $m/z$  calculated for  $\text{C}_{19}\text{H}_{26}\text{NO}_2\text{S}^+ [\text{M}+\text{NH}_4]^+$ : 332.1679, found: 332.1686.

*(E)*-1-Methyl-4-((1-phenylhept-1-en-3-yl)sulfonyl)benzene (**3w**, yxz-4-91)

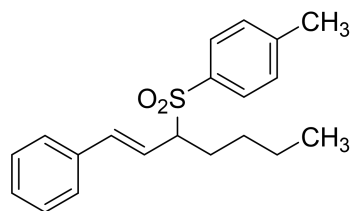

**3w**

49% isolated yield from **1w** (eluent: petroleum ether/ethyl acetate = 30/1), colorless oil;  $^1\text{H}$  NMR (400 MHz, Chloroform-*d*)  $\delta$  7.70 (d,  $J = 8.3$  Hz, 2H), 7.33-7.25 (m, 7H), 6.28 (d,  $J = 15.9$  Hz, 1H), 5.90 (dd,  $J = 15.9, 9.4$  Hz, 1H), 3.64-3.58 (m, 1H), 2.41 (s, 3H), 2.22-2.18 (m, 1H), 1.76-1.73 (m, 1H), 1.41-1.25 (m, 4H), 0.87 (t,  $J = 6.7$  Hz, 3H);  $^{13}\text{C}$  NMR (100 MHz, Chloroform-*d*)  $\delta$  144.4, 137.8, 135.9, 134.7, 129.4, 129.2, 128.6, 128.3, 126.5, 121.5, 69.7, 28.8, 27.1, 22.3, 21.6, 13.8.; HRMS (ESI)  $m/z$  calculated for  $\text{C}_{20}\text{H}_{24}\text{O}_2\text{SNa}^+ [\text{M}+\text{Na}]^+$ : 351.1389, found: 351.1389.

*(E)*-1-Methyl-4-((1-phenyloct-1-en-3-yl)sulfonyl)benzene (**3x**, yxz-4-92)

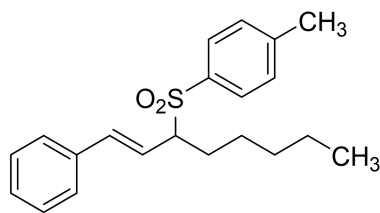

**3x**

53% isolated yield from **1x** (eluent: petroleum ether/ethyl acetate = 30/1), colorless oil;  $^1\text{H}$  NMR (400 MHz, Chloroform-*d*)  $\delta$  7.70 (d,  $J$  = 8.2 Hz, 2H), 7.31-7.26 (m, 7H), 6.28 (d,  $J$  = 15.9 Hz, 1H), 5.89 (dd,  $J$  = 15.9, 9.4 Hz, 1H), 3.64-3.58 (m, 1H), 2.41 (s, 3H), 2.22-2.14 (m, 1H), 1.78-1.69 (m, 1H), 1.42-1.39 (m, 1H), 1.31-1.25 (m, 5H), 0.85 (t,  $J$  = 4.8 Hz, 3H);  $^{13}\text{C}$  NMR (100 MHz, Chloroform-*d*)  $\delta$  144.4, 137.8, 136.0, 134.7, 129.4, 129.2, 128.6, 128.3, 126.5, 121.5, 69.7, 31.3, 27.3, 26.4, 22.3, 21.6, 13.9; HRMS (ESI)  $m/z$  calculated for  $\text{C}_{21}\text{H}_{30}\text{NO}_2\text{S}^+$   $[\text{M}+\text{NH}_4]^+$ : 360.1992, found: 360.1997.

### General procedure for asymmetric palladium-catalyzed migratory allylic sulfonylation of allylic alcohols

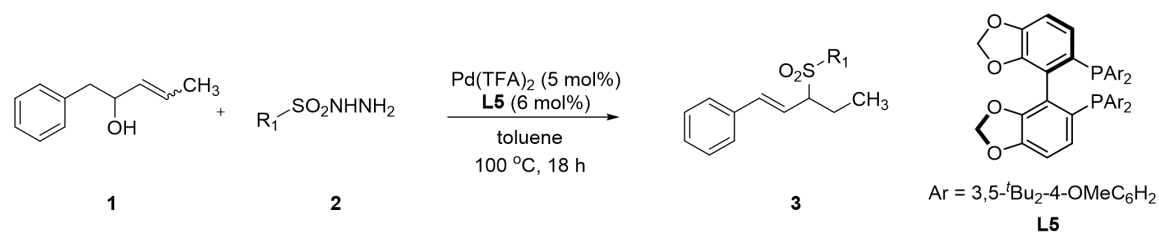

Under a nitrogen atmosphere, to a mixture of  $\text{Pd}(\text{TFA})_2$  (3.3 mg, 0.01 mmol), **L5** (14.1 mg, 0.012 mmol), and sulfonyl hydrazide (0.4 mmol) was added a solution of allylic alcohol **1** (0.2 mmol) in toluene (1.0 mL). The reaction was sealed and stirred at 100 °C for 18 h. Subsequently, the reaction was cooled down to room temperature, and the mixture was evaporated and purified via column chromatography on silica gel (eluent: petroleum ether/ethyl acetate) to afford desired product.

*(E)*-1-Methyl-4-((1-phenylpent-1-en-3-yl)sulfonyl)benzene (**3a**, yxz-3-70)<sup>[3]</sup>

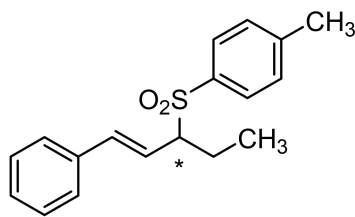

**3a**

60% isolated yield from **1a** (eluent: petroleum ether/ethyl acetate = 30/1), colorless oil;

70:30 *er*; HPLC analysis: Chiralcel IC column; detected at 250 nm, 25 °C; 20% *i*-PrOH in *n*-hexane; flow = 1.0 mL/min; Retention time: 19.9 min (minor), 24.1 min (major).

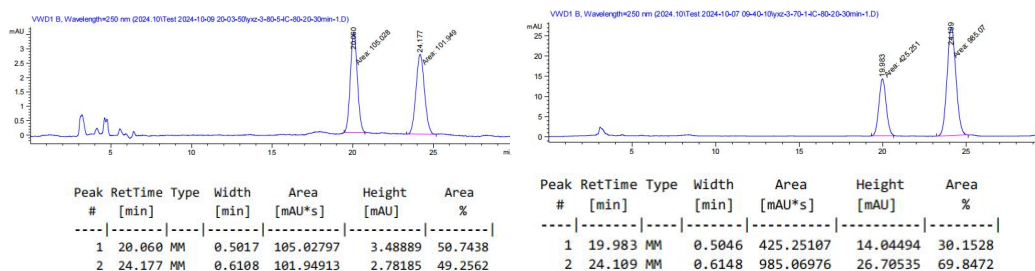

*(E)*-1-Methoxy-4-((1-phenylpent-1-en-3-yl)sulfonyl)benzene (**3o**, yxz-8-56) [3]

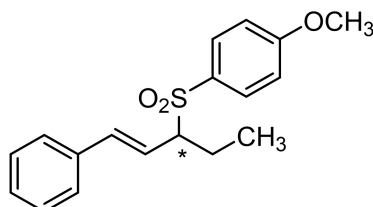

**3o**

34% isolated yield from **1a** (eluent: petroleum ether/ethyl acetate = 15/1), colorless oil; 78:22 *er*; HPLC analysis: Chiralcel AD column; detected at 250 nm, 25 °C; 20% *i*-PrOH in *n*-hexane; flow = 1.0 mL/min; Retention time: 10.5 min (major), 11.8 min (minor).

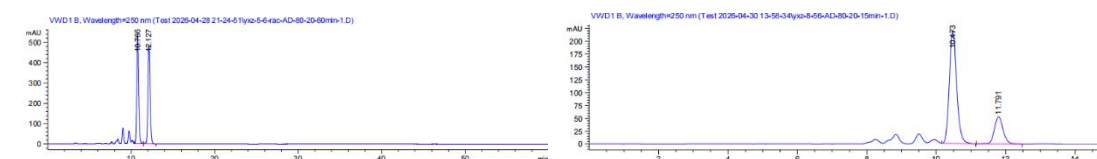

| Peak # | RetTime [min] | Type | Width [min] | Area [mAU*s] | Height [mAU] | Area %  | Peak # | RetTime [min] | Type | Width [min] | Area [mAU*s] | Height [mAU] | Area %  |
|--------|---------------|------|-------------|--------------|--------------|---------|--------|---------------|------|-------------|--------------|--------------|---------|
| 1      | 10.766        | BB   | 0.2487      | 8688.19043   | 537.19696    | 49.8986 | 1      | 10.473        | BB   | 0.2245      | 3208.88843   | 219.52364    | 77.8115 |
| 2      | 12.127        | BB   | 0.2790      | 8723.51367   | 482.29193    | 50.1014 | 2      | 11.791        | VB R | 0.2683      | 915.03723    | 52.77918     | 22.1885 |

(*E*)-1-Chloro-4-((1-phenylpent-1-en-3-yl)sulfonyl)benzene (**3r**, yxz-8-57) [3]

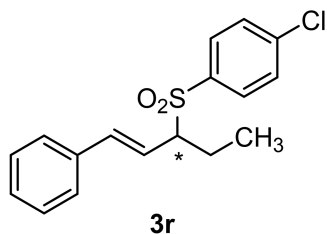

30% isolated yield from **1a** (eluent: petroleum ether/ethyl acetate = 20/1), white solid; 80:20 *er*; HPLC analysis: Chiralcel OJ column; detected at 250 nm, 25 °C; 20% *i*-PrOH in *n*-hexane; flow = 1.0 mL/min; Retention time: 11.0 min (major), 15.0 min (minor).

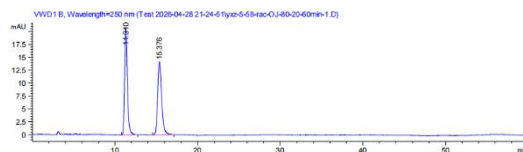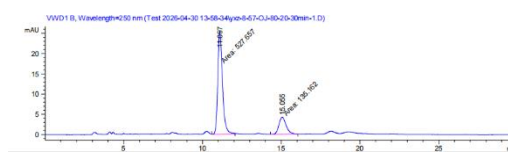

| Peak # | RetTime [min] | Type | Width [min] | Area [mAU*s] | Height [mAU] | Area %  | Peak # | RetTime [min] | Type | Width [min] | Area [mAU*s] | Height [mAU] | Area %  |
|--------|---------------|------|-------------|--------------|--------------|---------|--------|---------------|------|-------------|--------------|--------------|---------|
| 1      | 11.310        | BB   | 0.3531      | 478.81076    | 20.75767     | 50.0632 | 1      | 11.097        | MM   | 0.3463      | 527.65662    | 25.39371     | 79.6080 |
| 2      | 15.376        | BB   | 0.5148      | 477.60208    | 14.18531     | 49.9368 | 2      | 15.055        | MM   | 0.5320      | 135.16187    | 4.23439      | 20.3920 |

## Deuterium labeling experiments

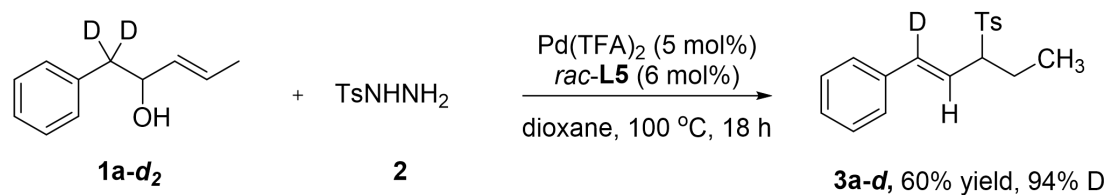

Under a nitrogen atmosphere, to a mixture of Pd(TFA)<sub>2</sub> (3.3 mg, 0.01 mmol), *rac-L5* (6.7 mg, 0.012 mmol), and sulfonyl hydrazide (0.2 mmol) was added a solution of **1a-d<sub>2</sub>** (0.4 mmol) in 1,4-dioxane (1.0 mL). The reaction was sealed and stirred at 100 °C for 18 h. Subsequently, the reaction was cooled down to room temperature, and the mixture was evaporated and purified via column chromatography on silica gel (eluent: petroleum ether/ethyl acetate) to afford the desired product **3a-d**: colorless oil.

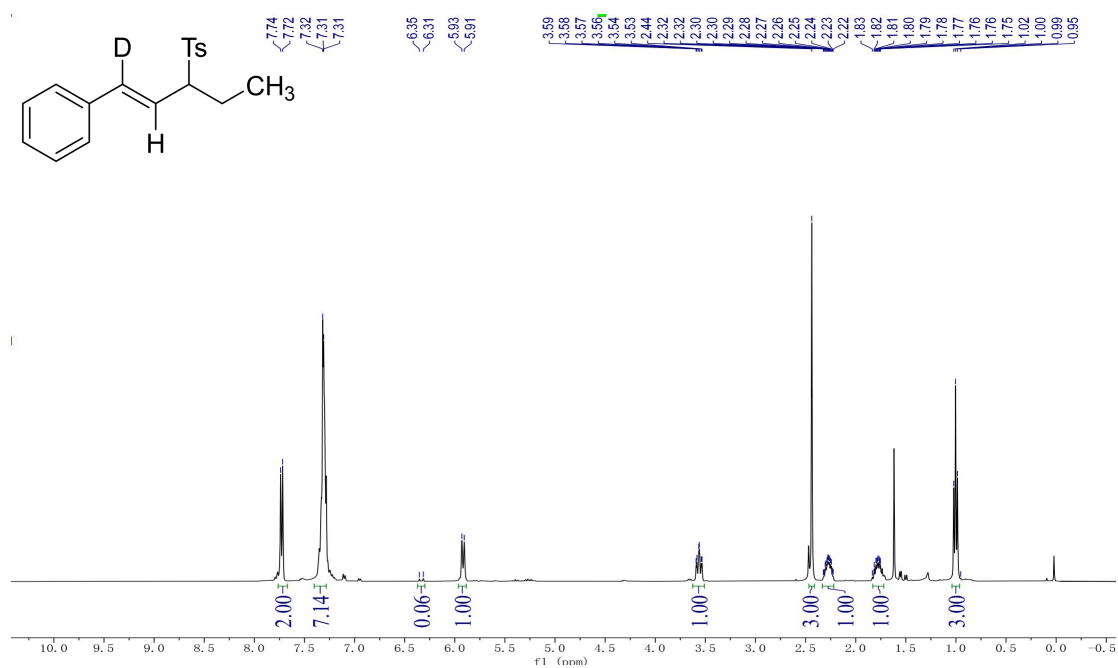

## References

1. D. Zhao, B. Xu, C. Zhu, Migratory allylic arylation of 1,n-enols enabled by nickel catalysis. *Nat. Commun.* **2023**, *14*, 3308.
2. M.-M. Li, L. Cheng, L.-J. Xiao, J.-H. Xie,; Q.-L. Zhou, Palladium-Catalyzed Asymmetric Hydrosulfonylation of 1,3-Dienes with Sulfonyl Hydrazides. *Angew. Chem. Int. Ed.* **2021**, *60*, 2948.
3. Q. Zhang, D. Dong, W. Zi, Palladium-Catalyzed Regio- and Enantioselective Hydrosulfonylation of 1,3-Dienes with Sulfinic Acids : Scope, Mechanism, and Origin of Selectivity. *J. Am. Chem. Soc.* **2020**, *142*, 15860.

# $^1\text{H}$ NMR and $^{13}\text{C}$ NMR spectra for compounds

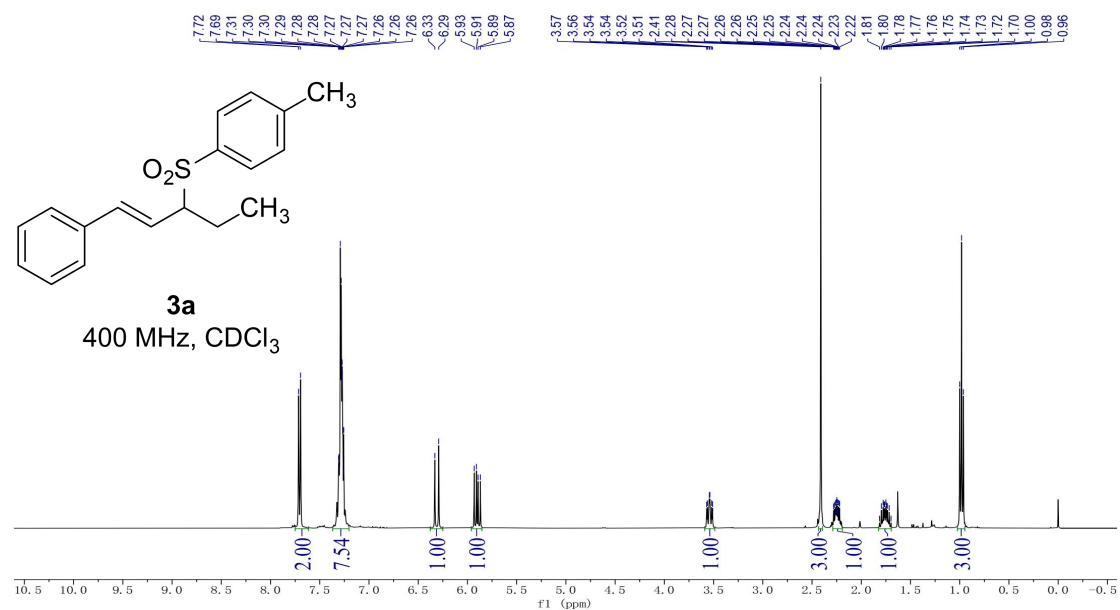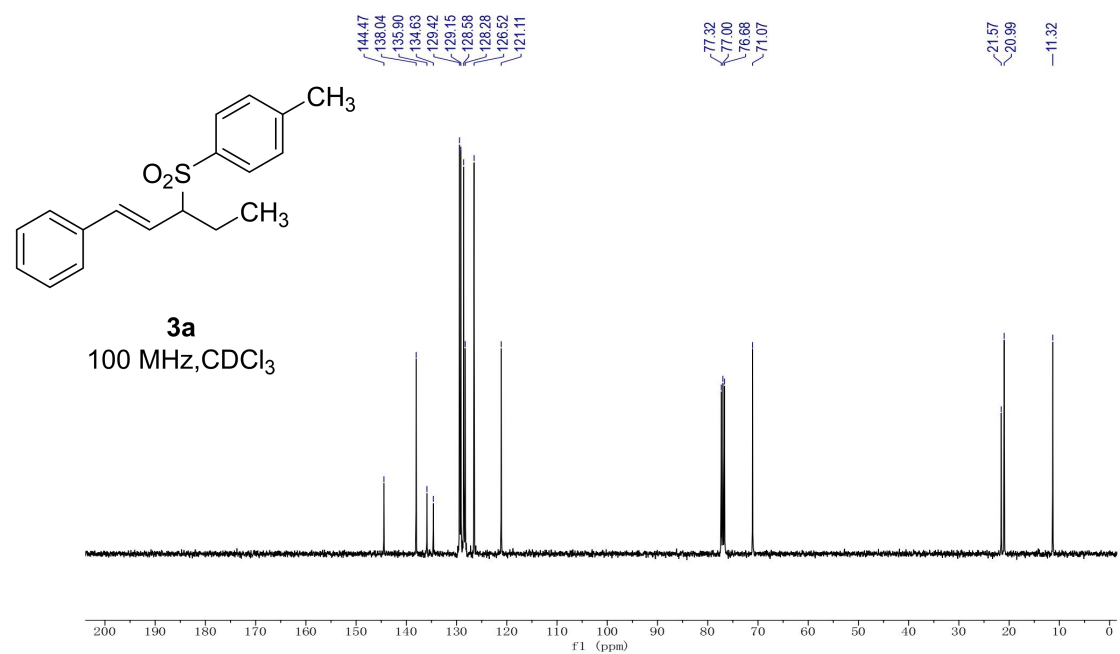

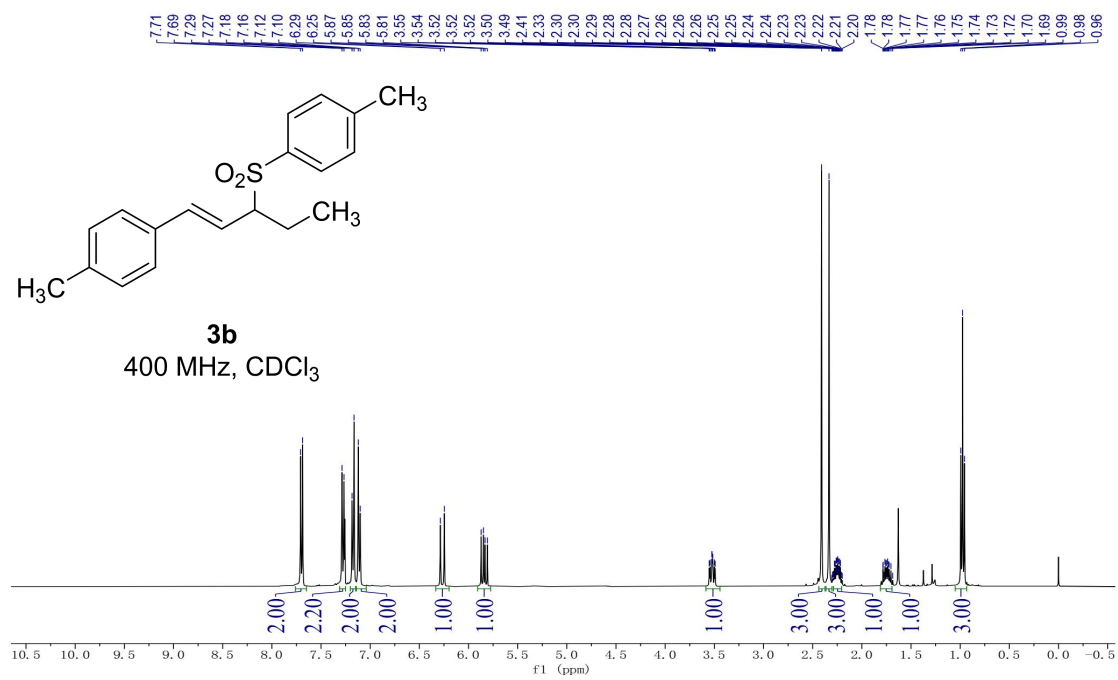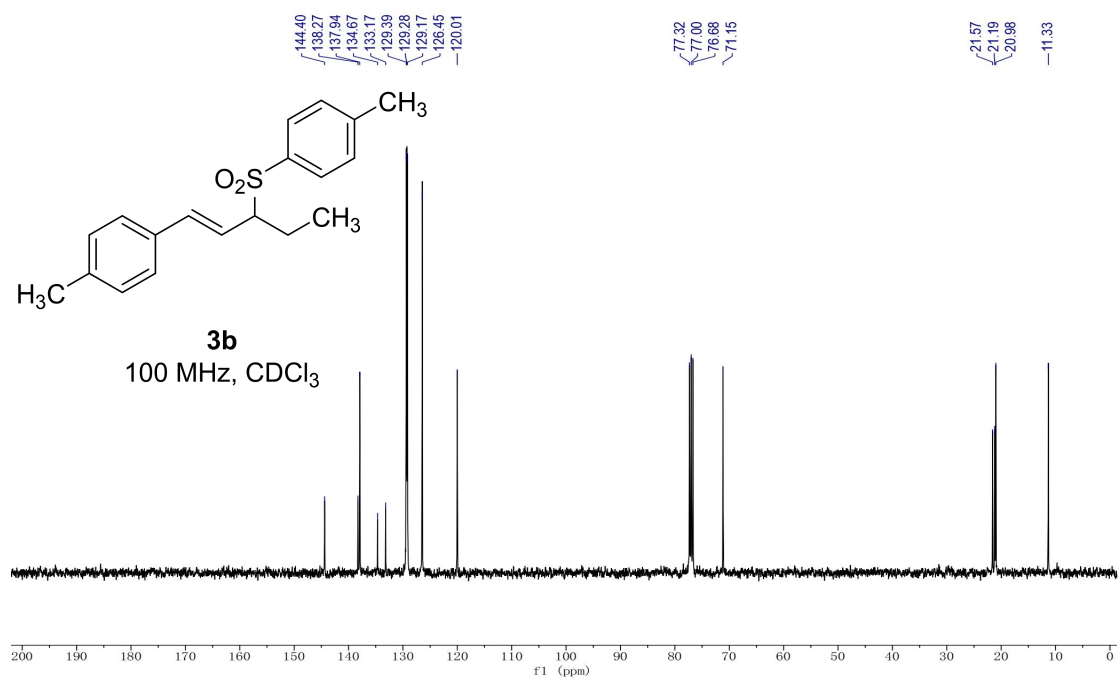

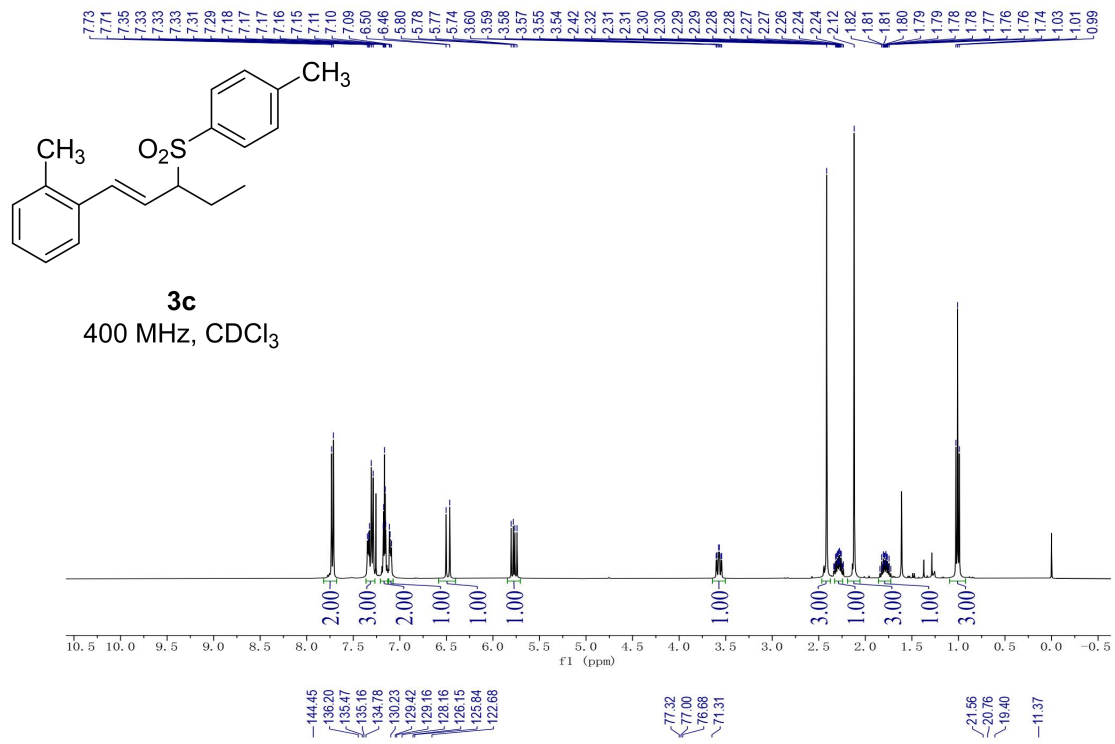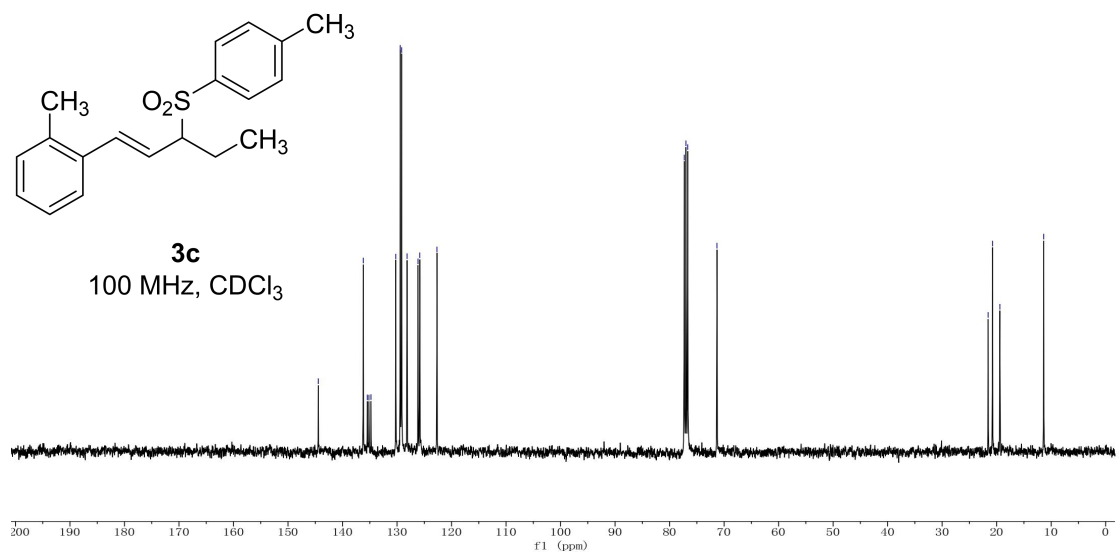

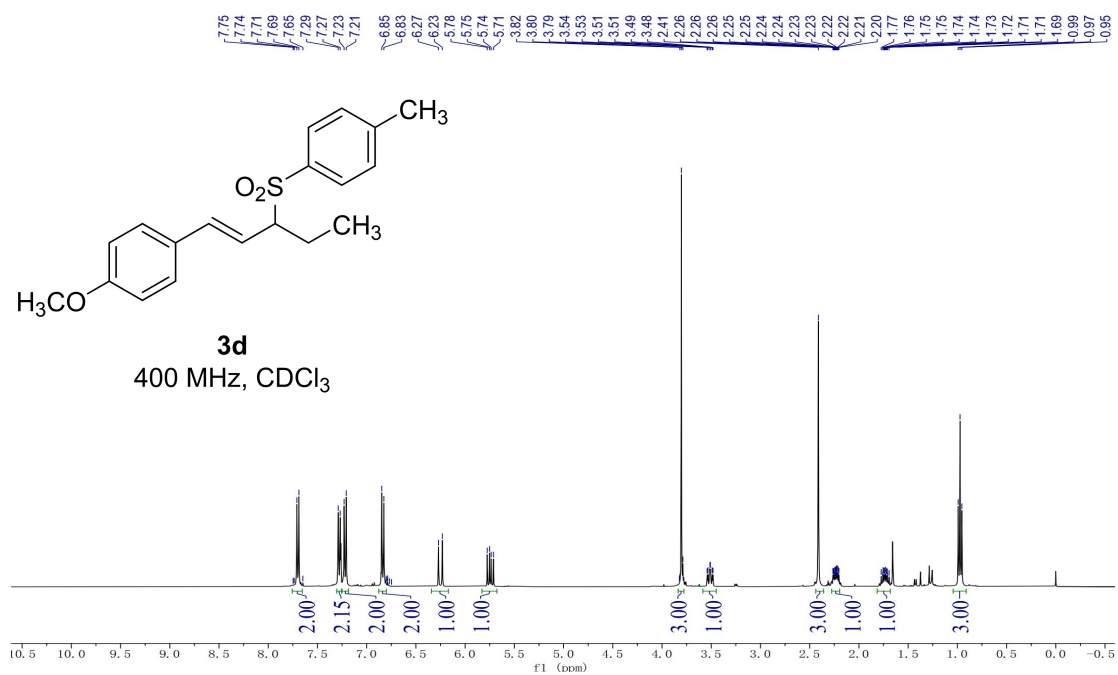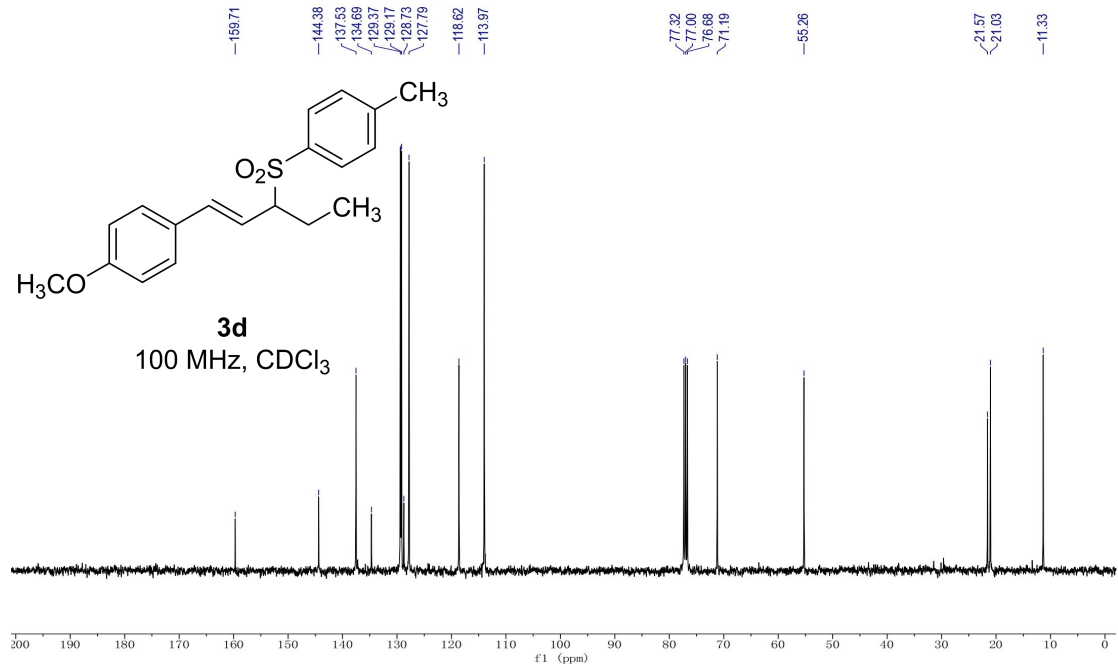

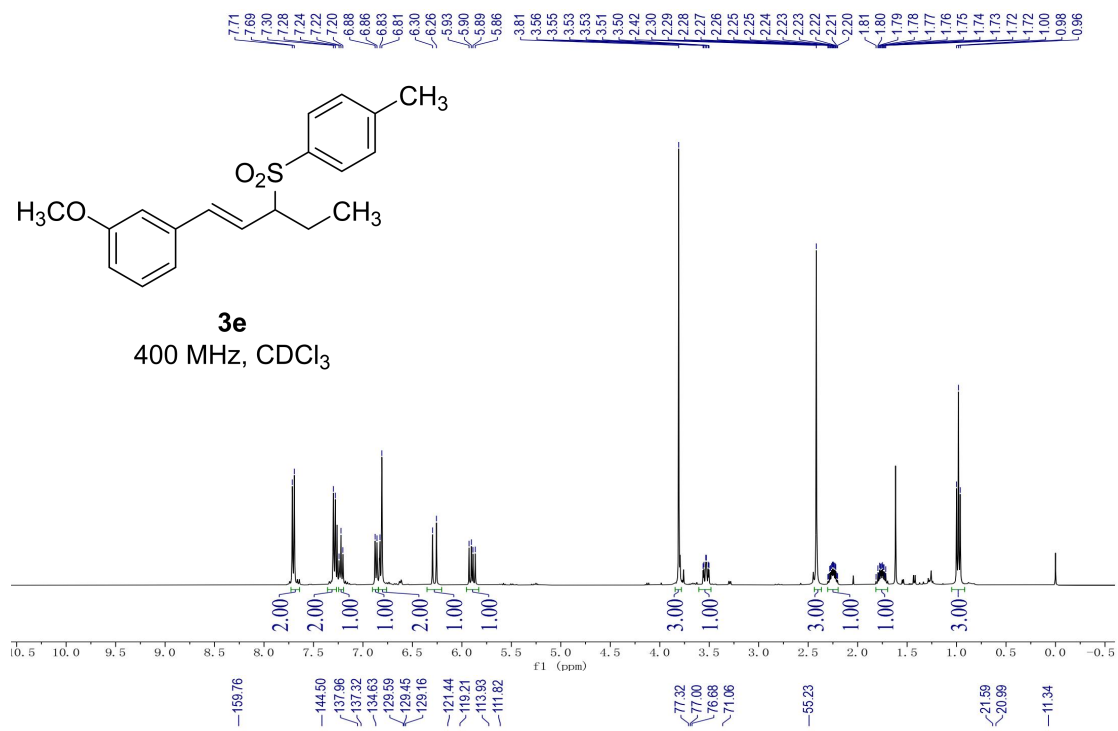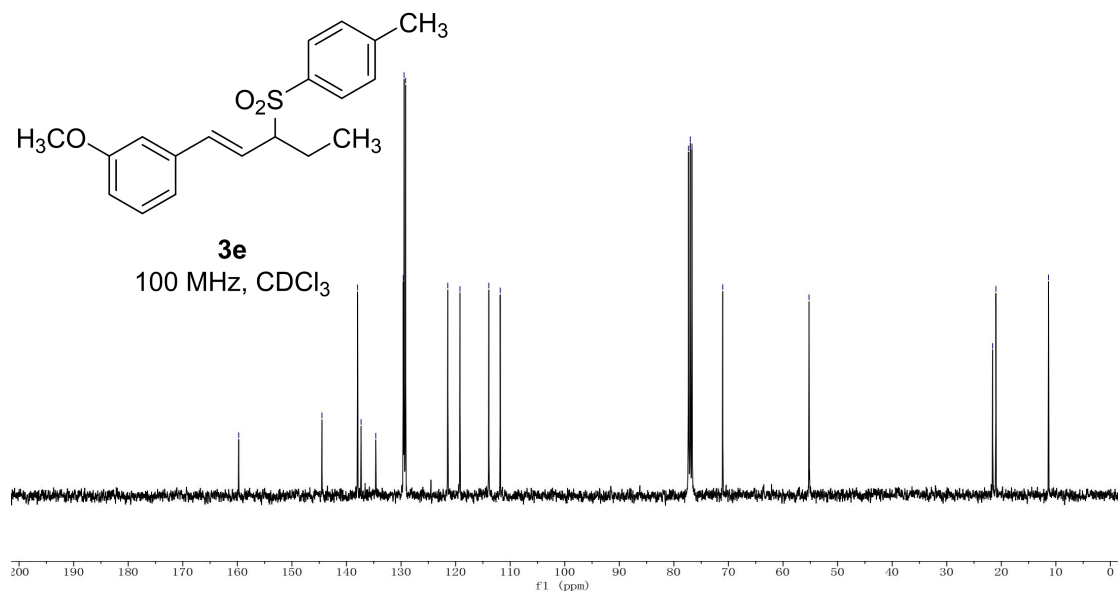

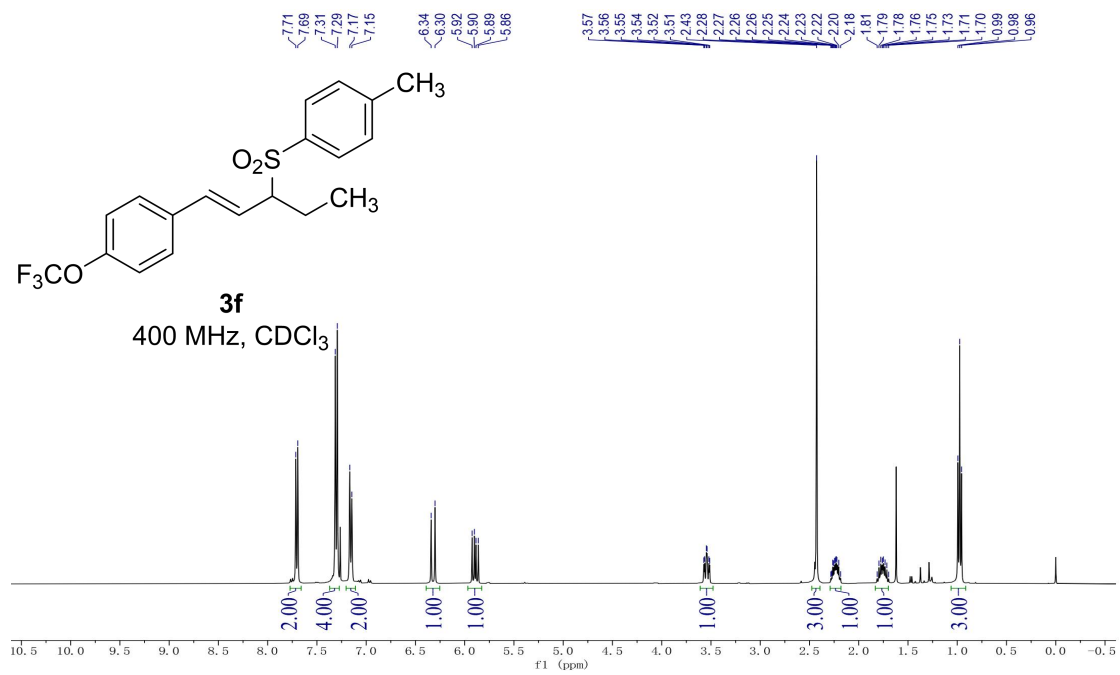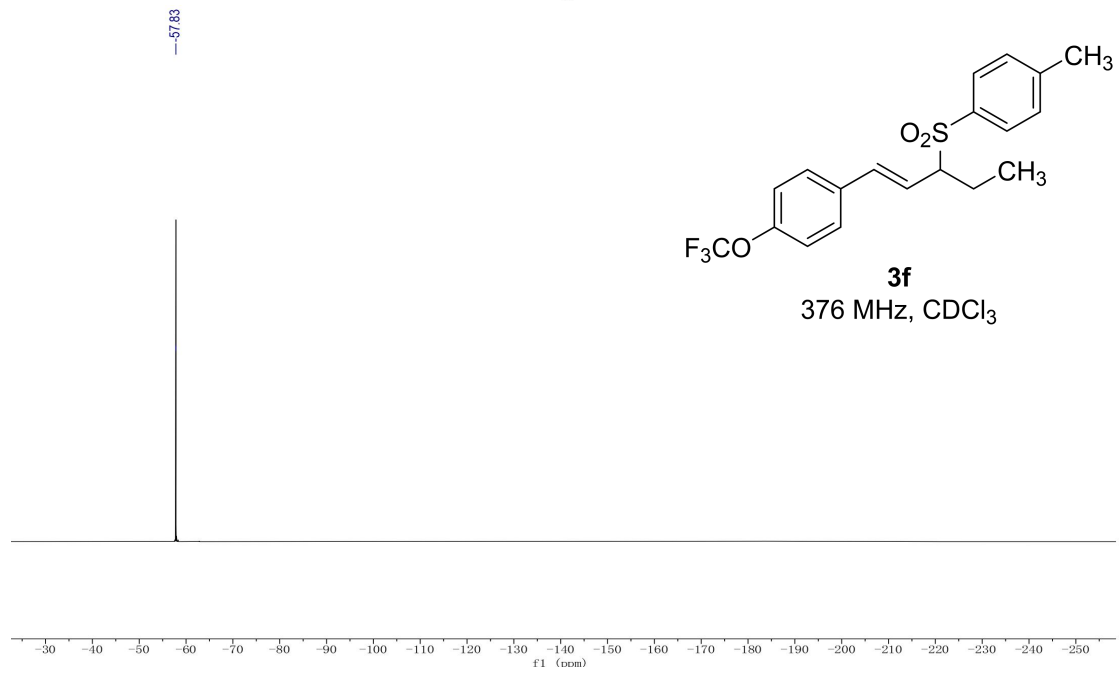

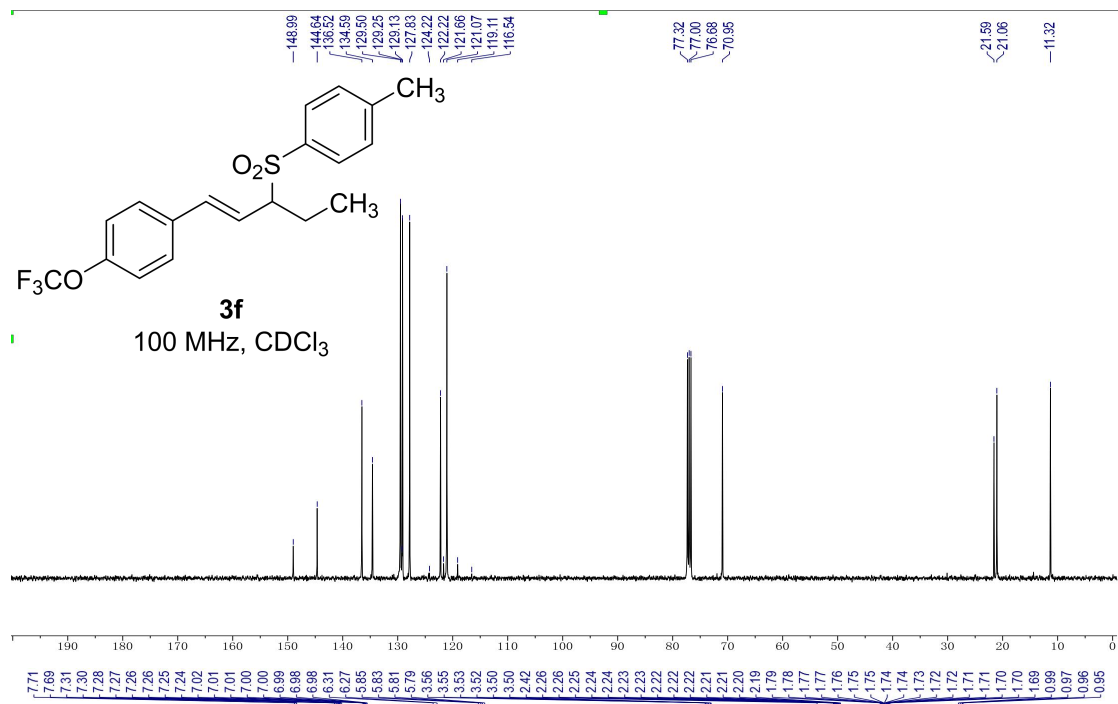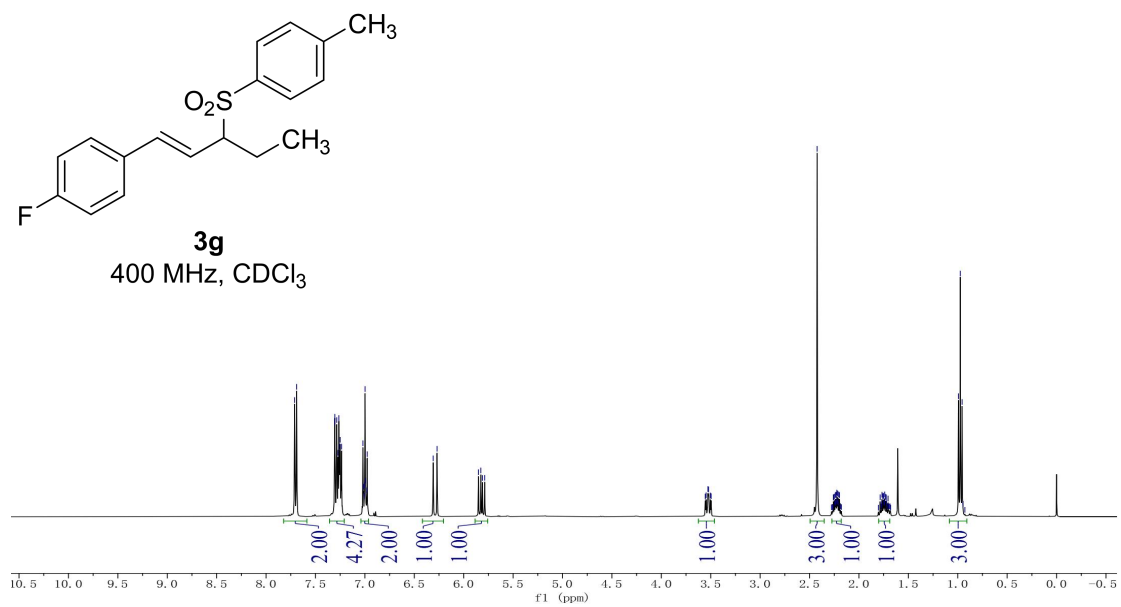

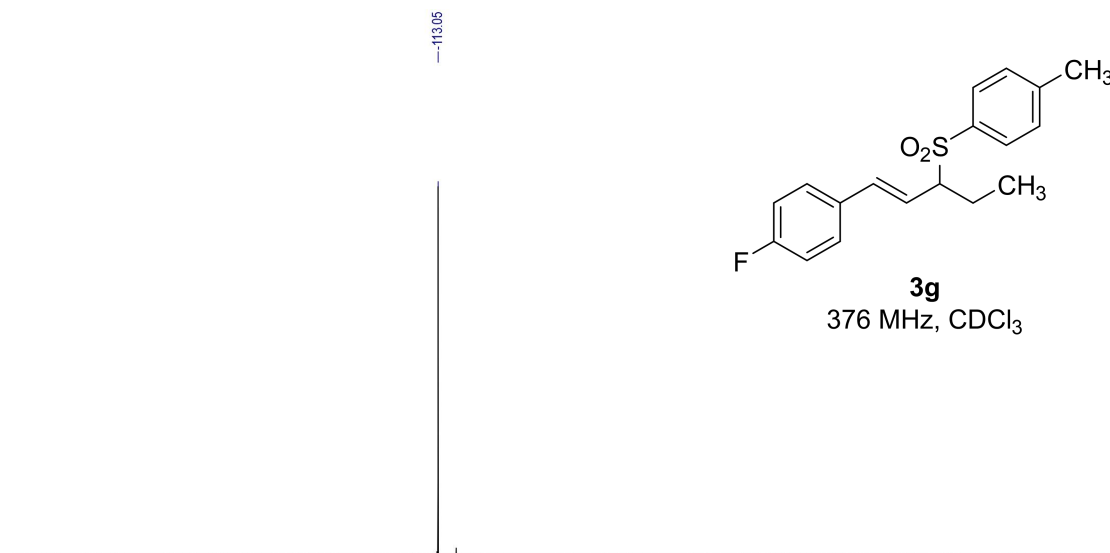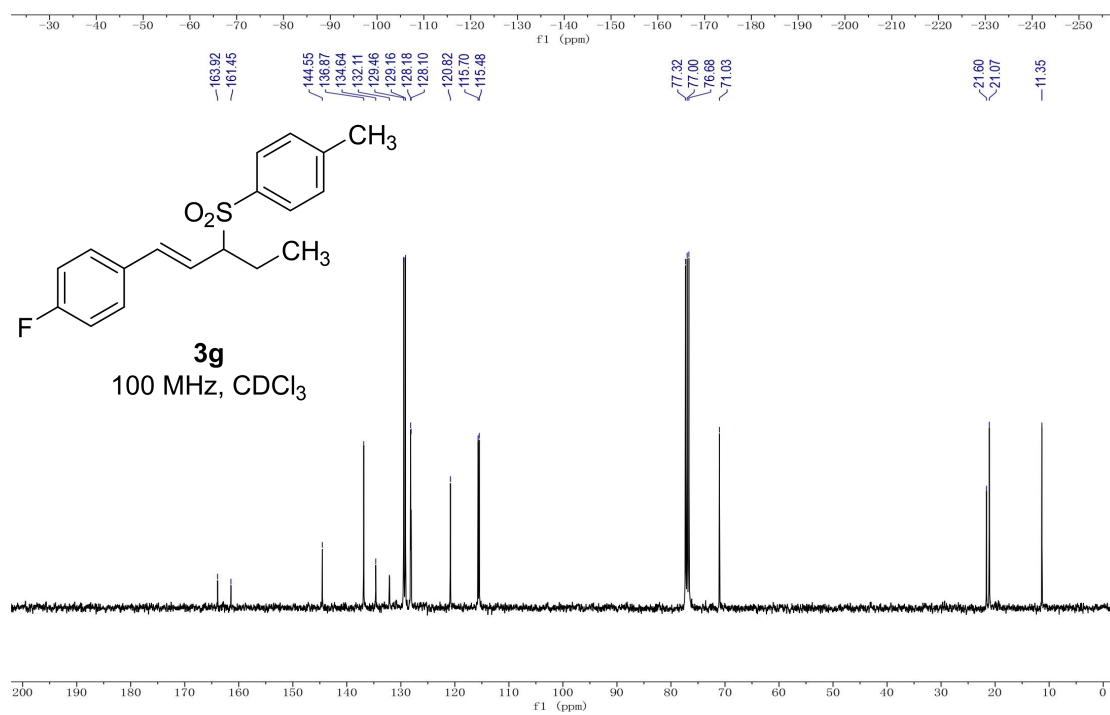

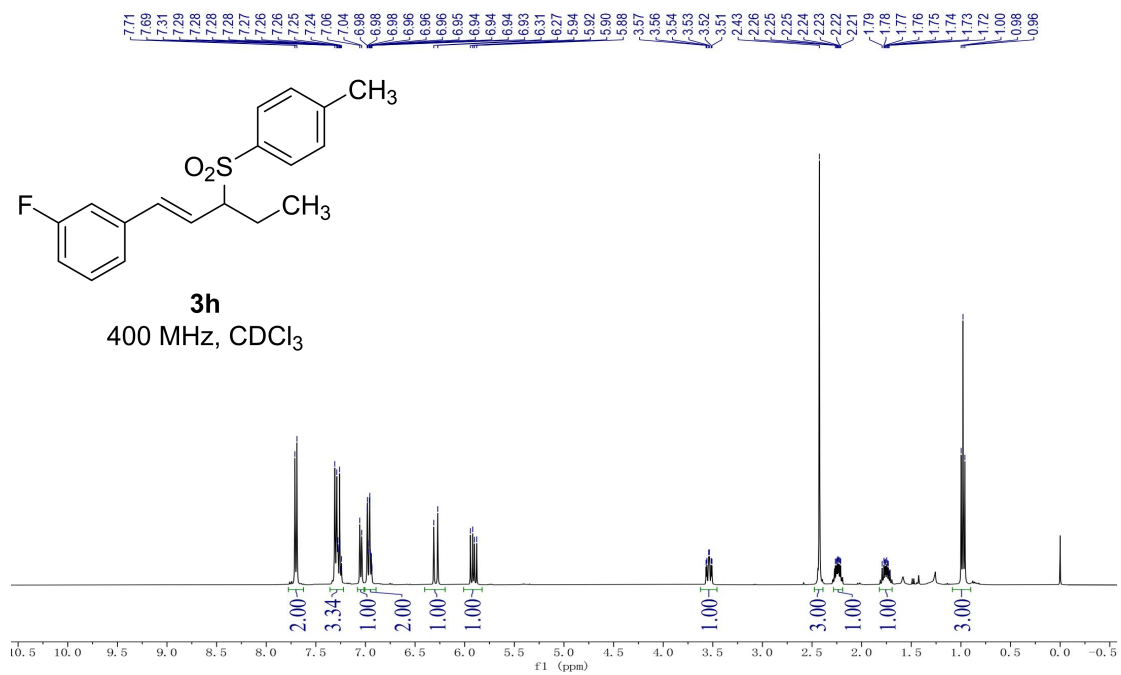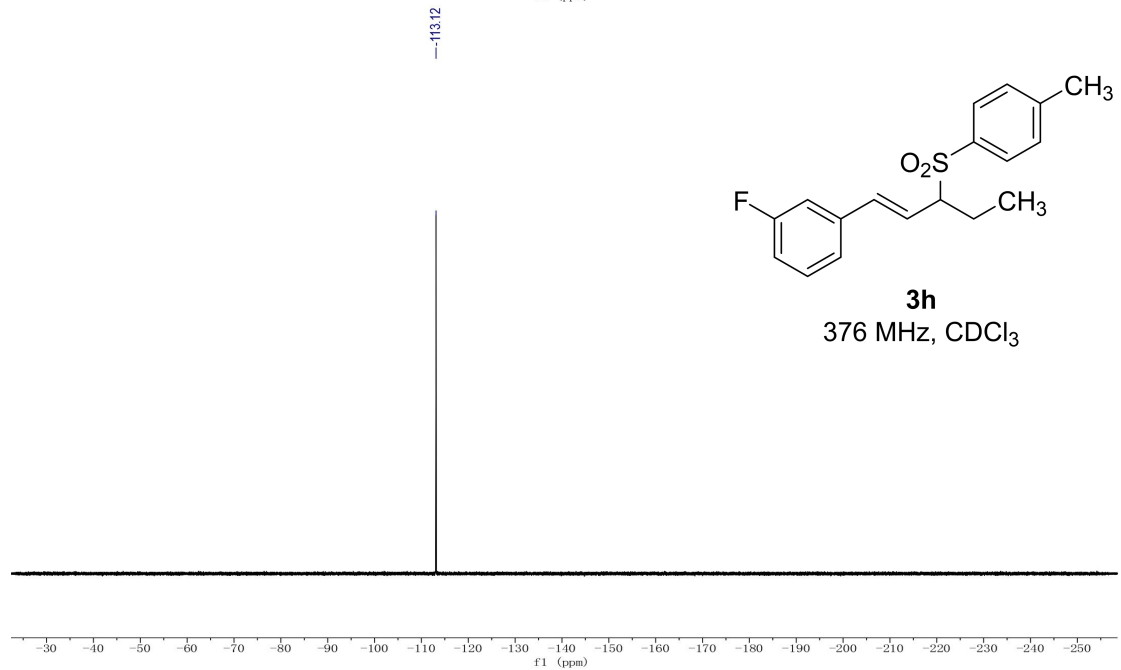

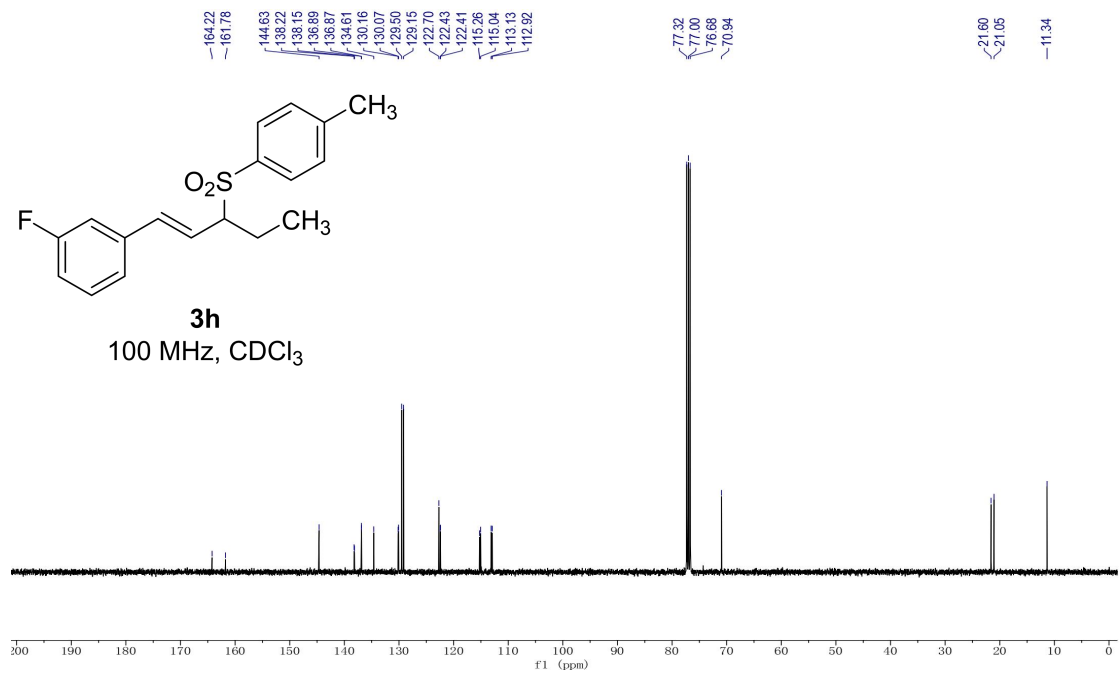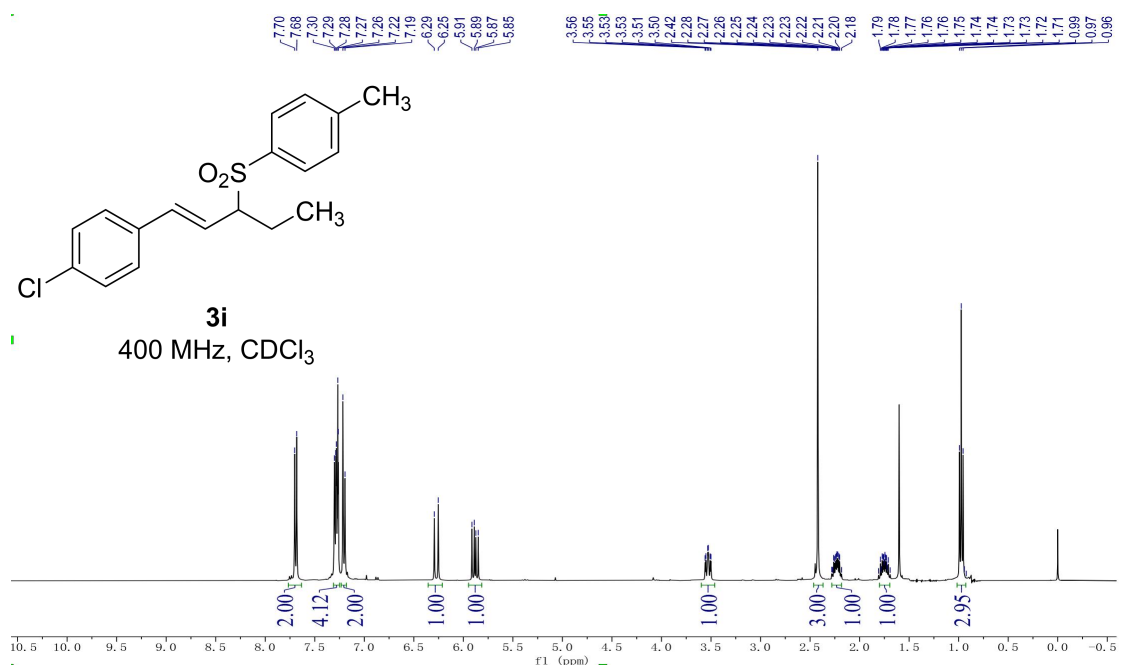

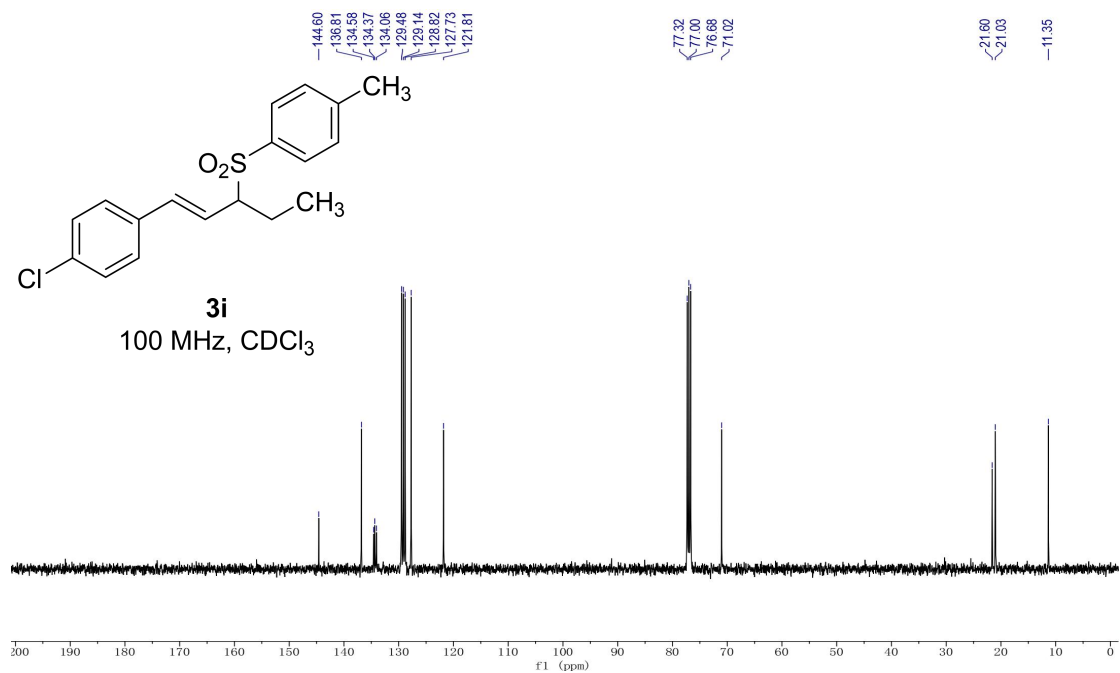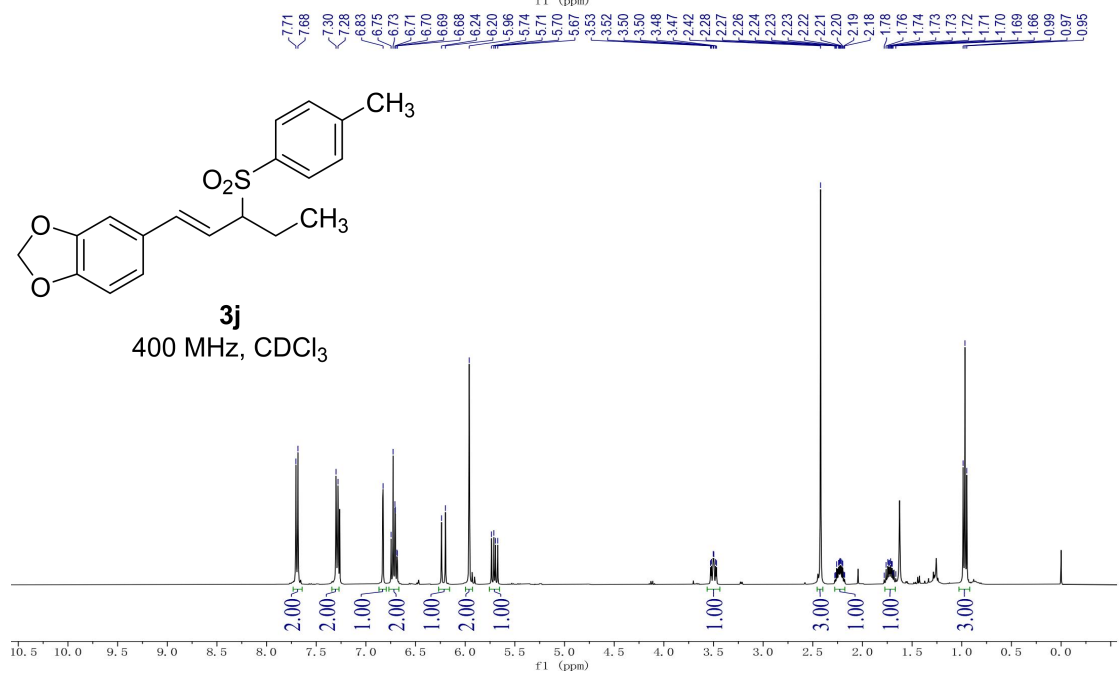

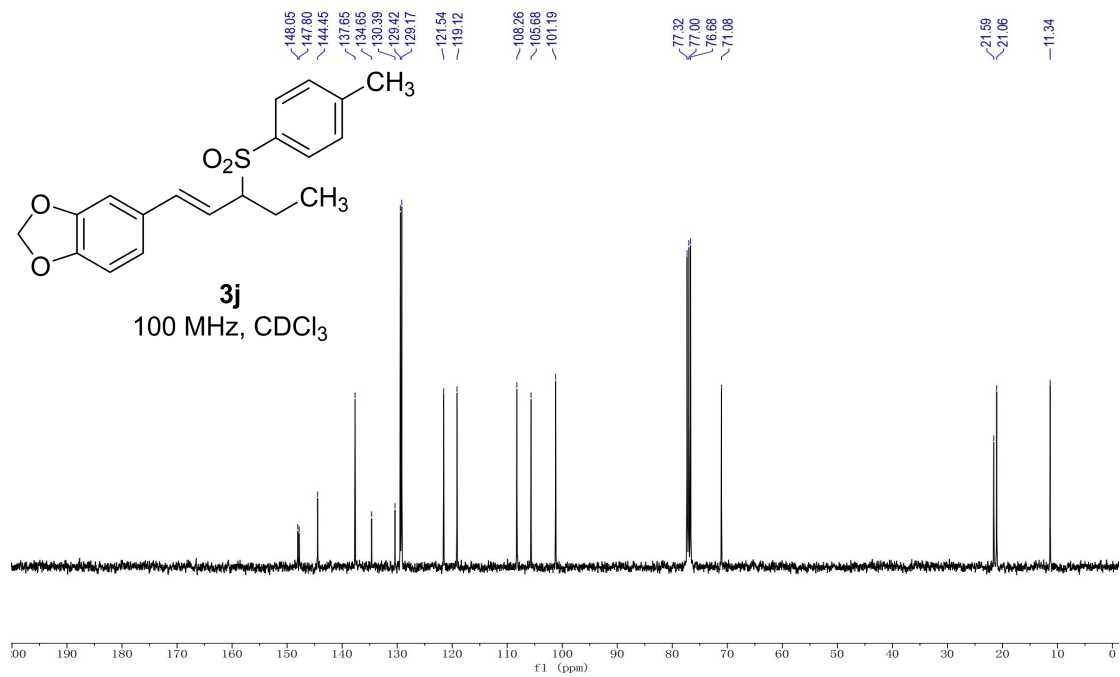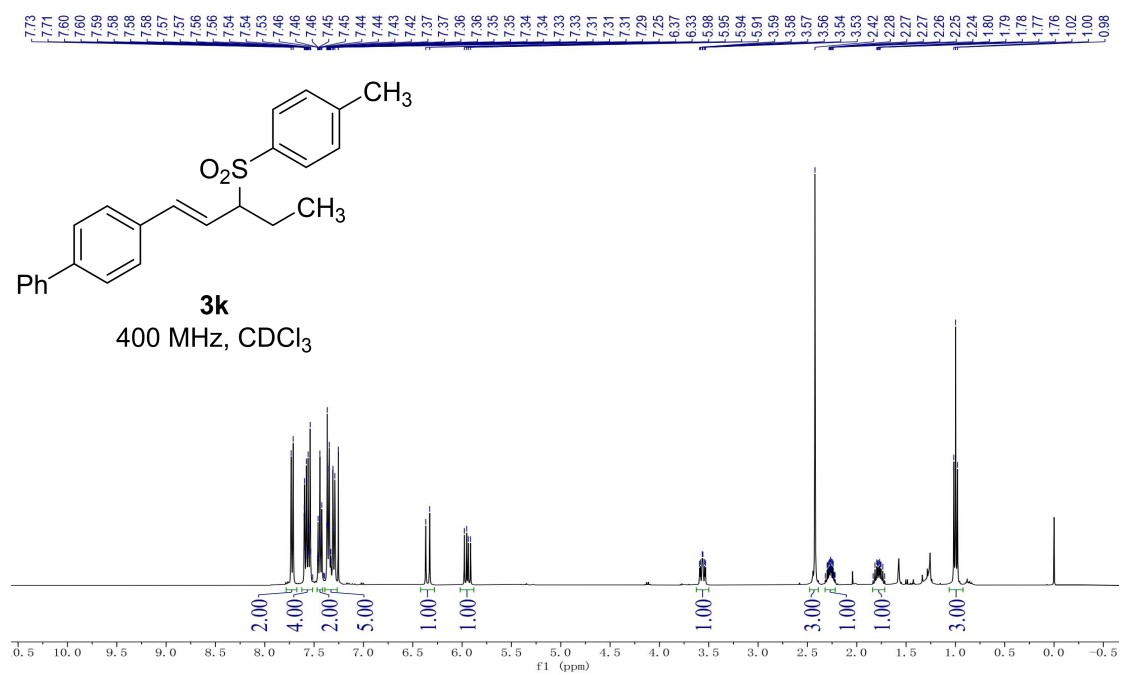



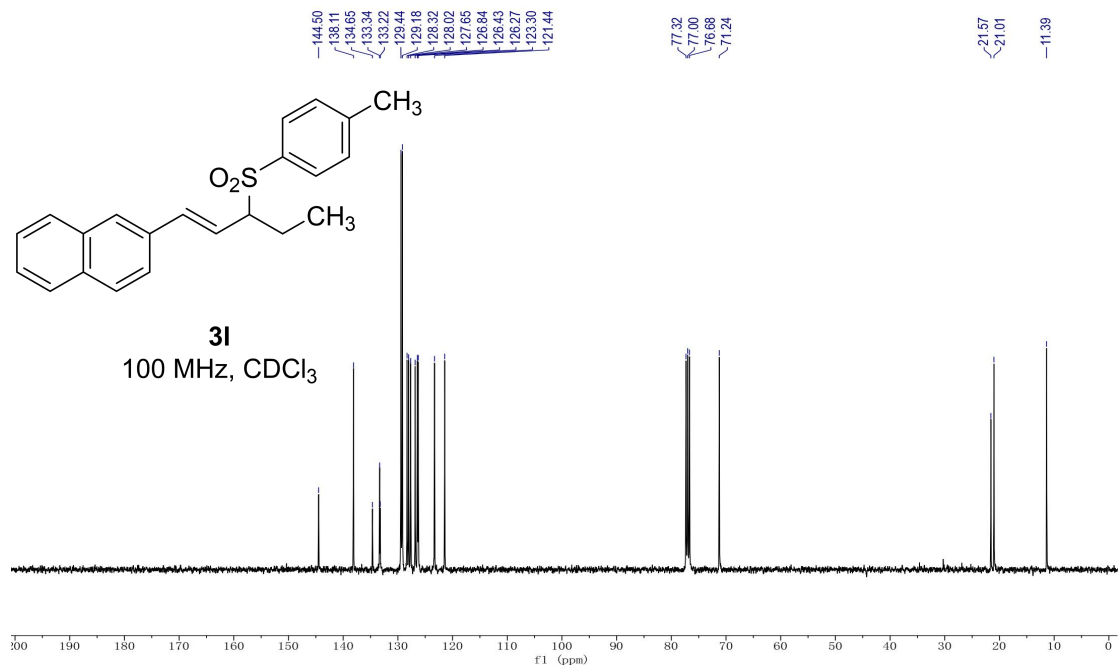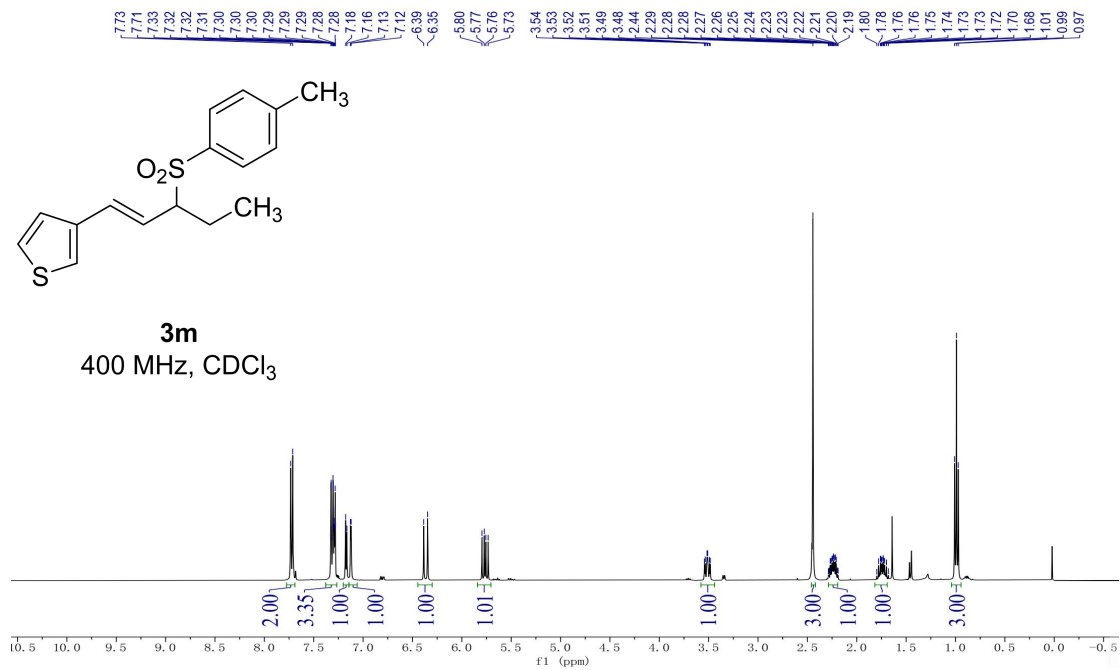

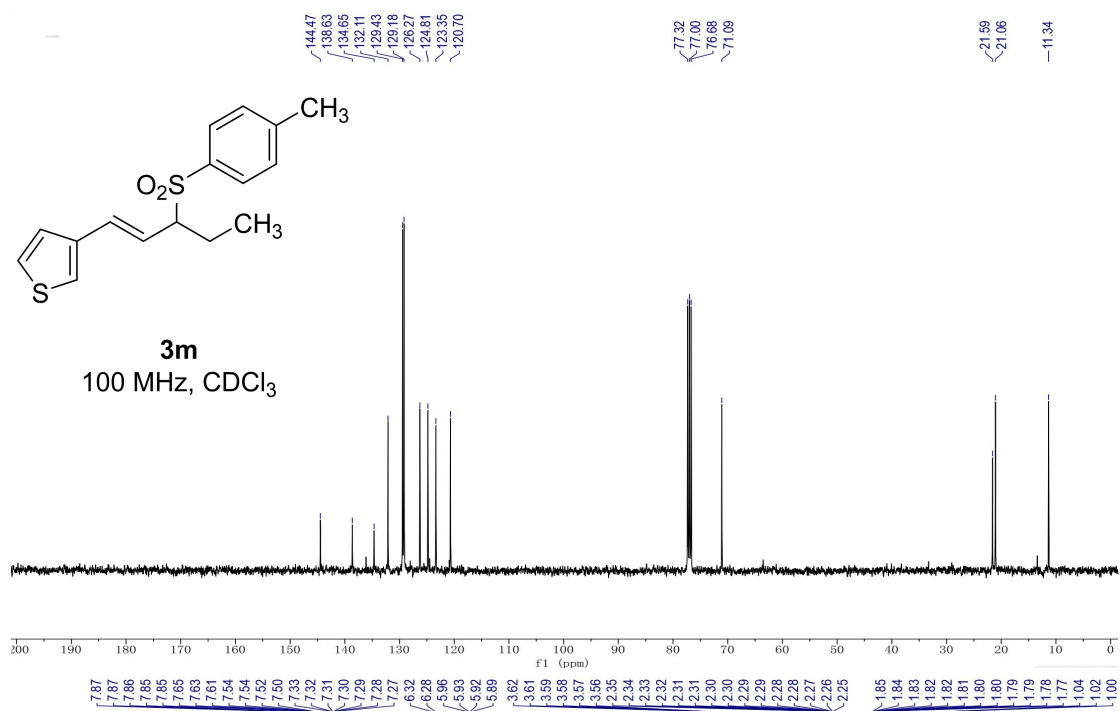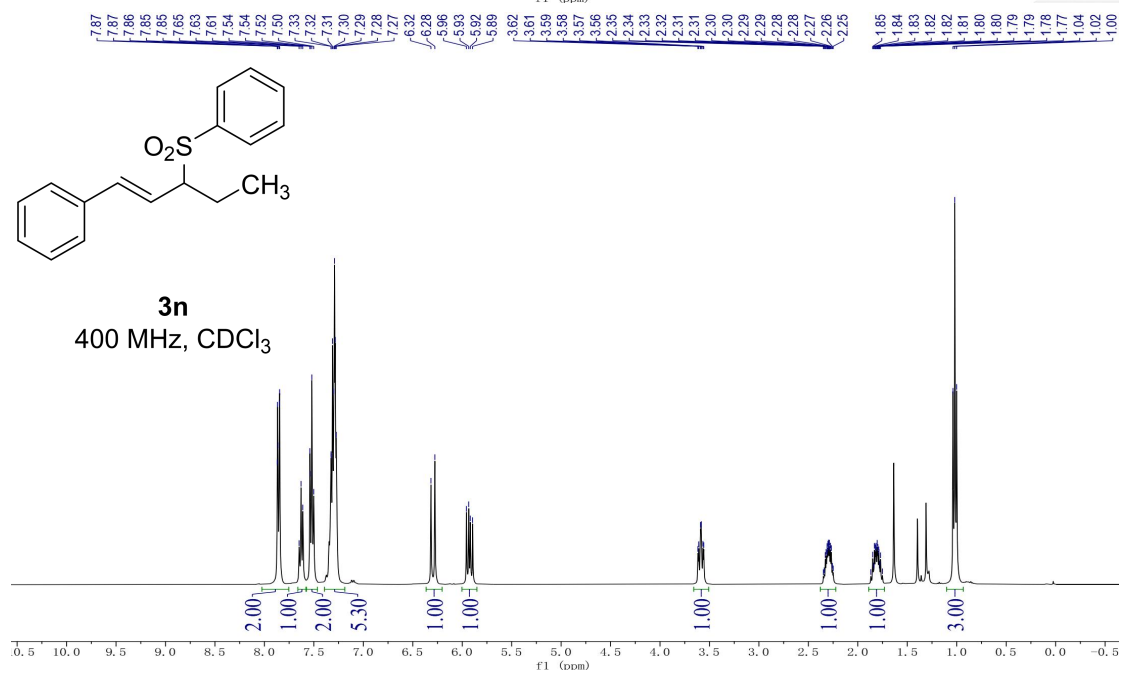

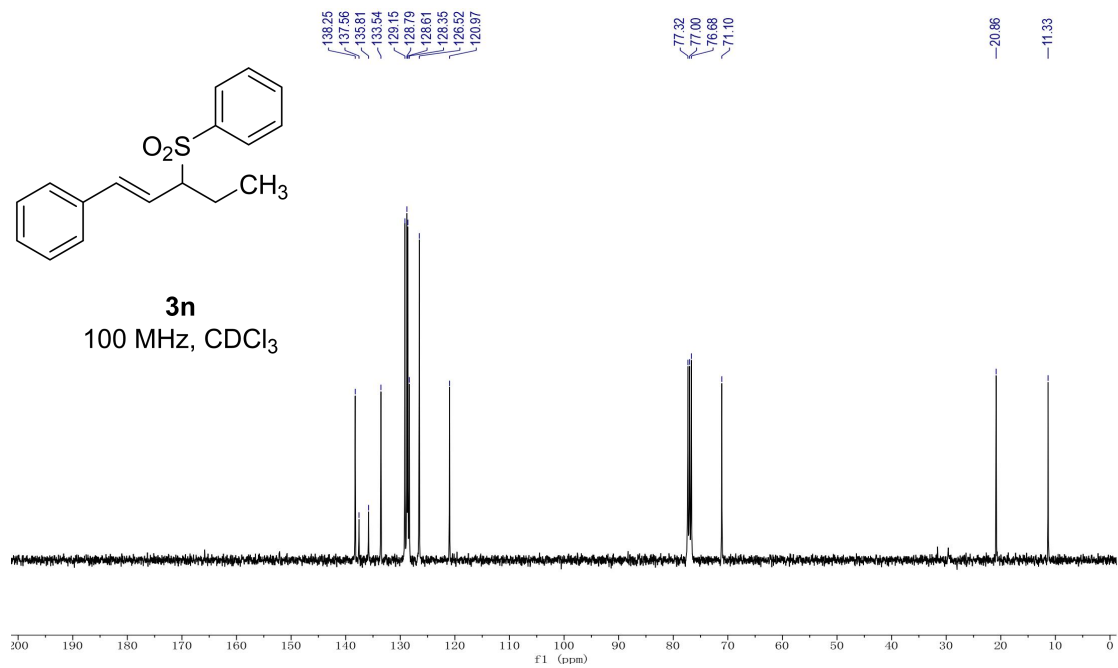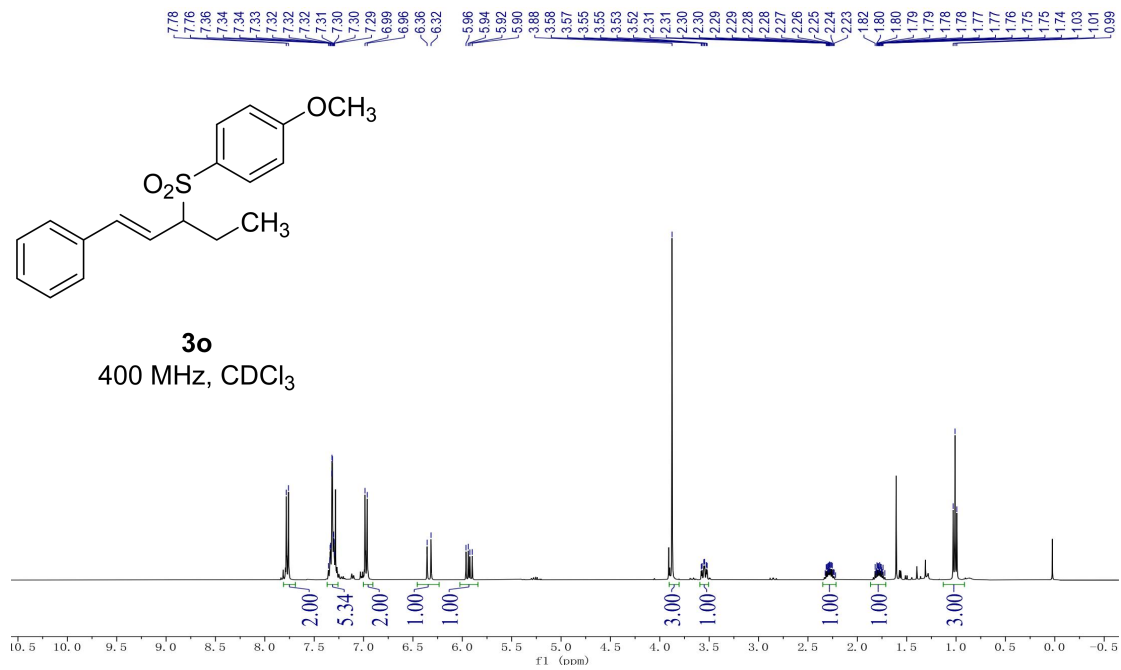

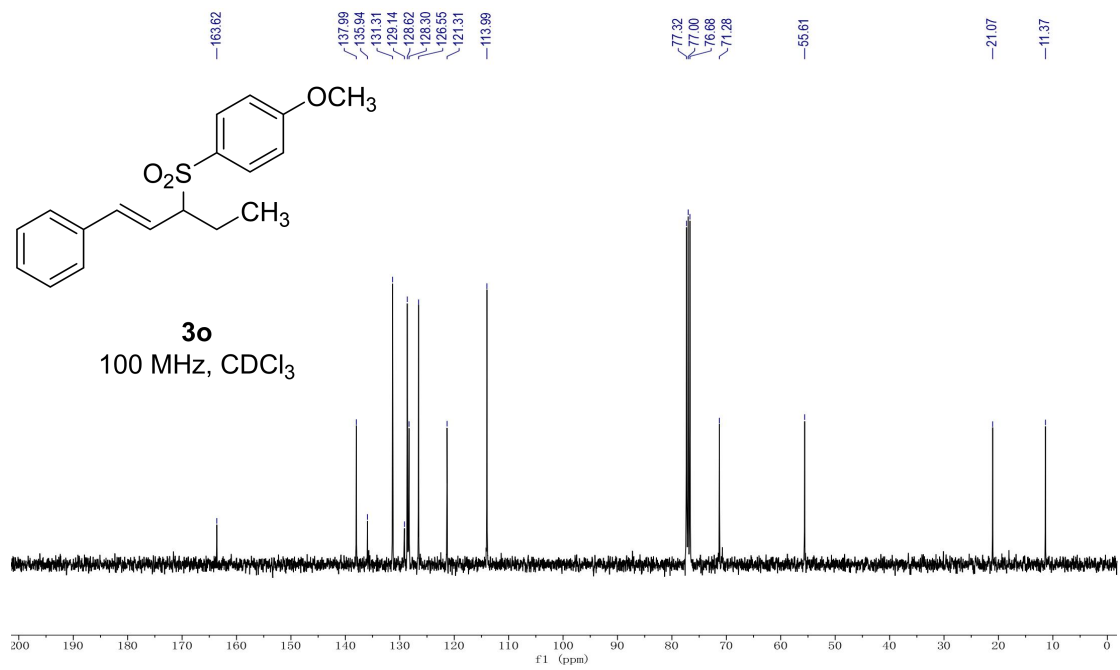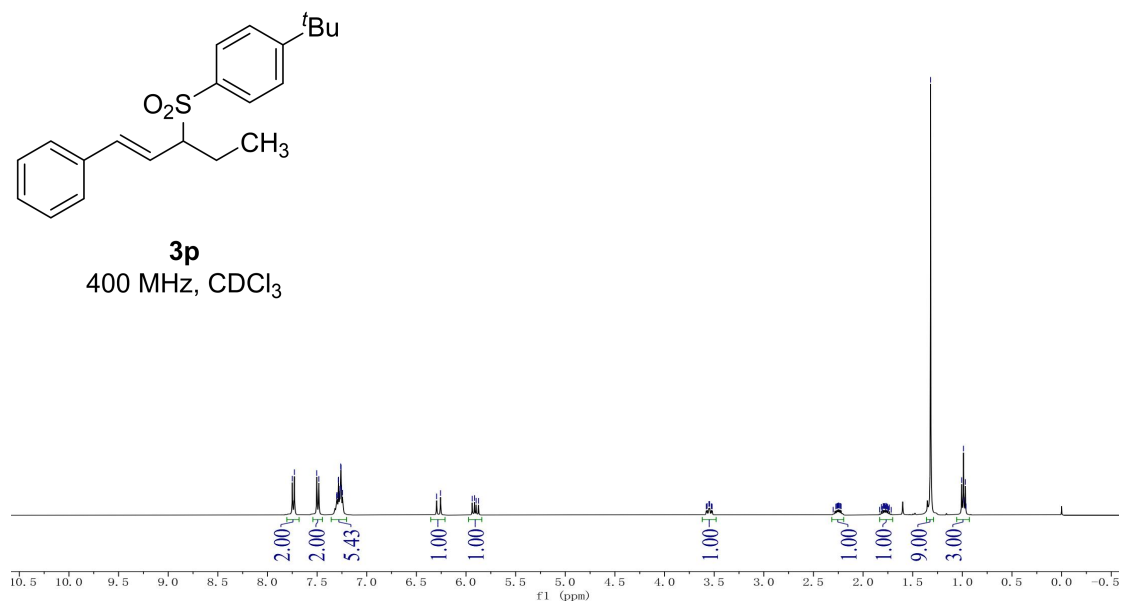

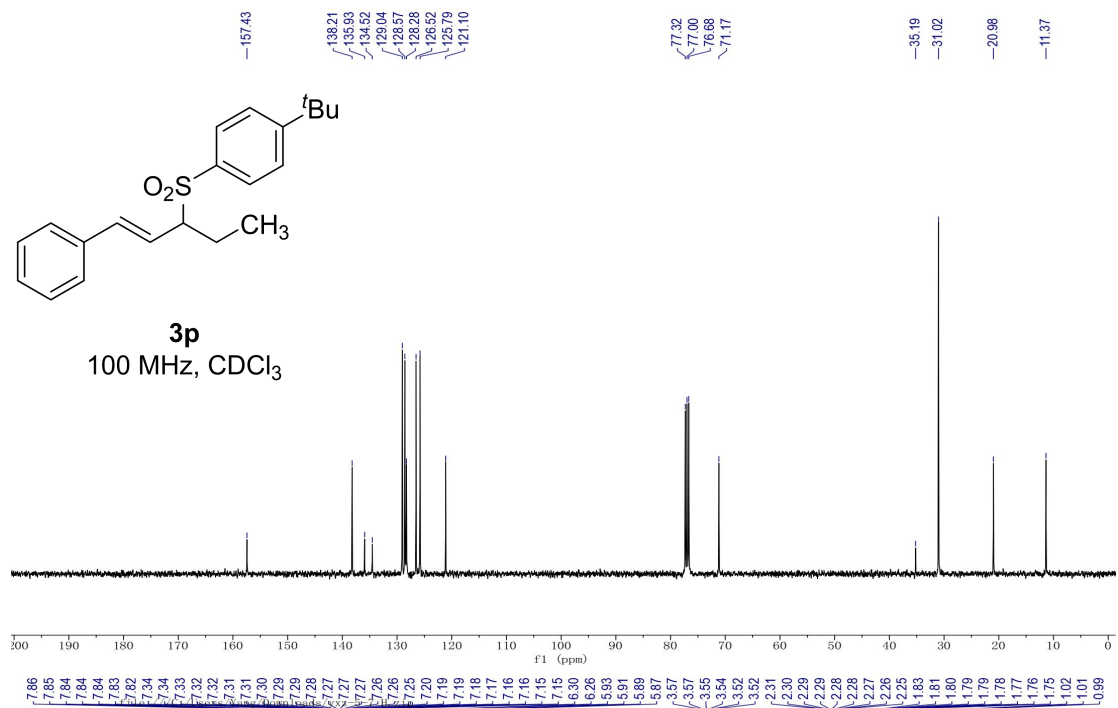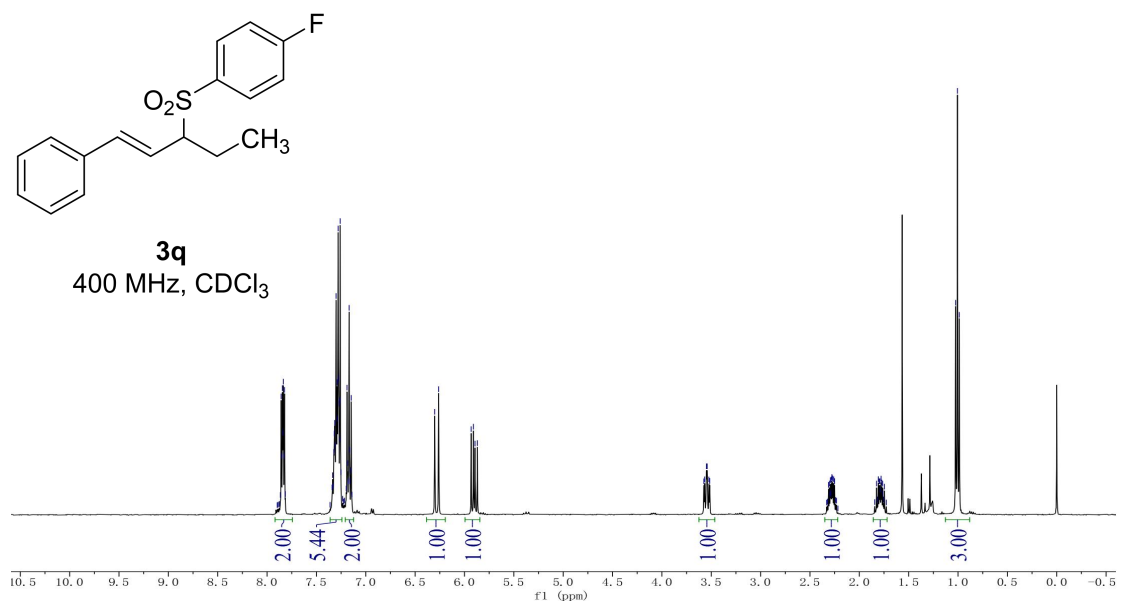

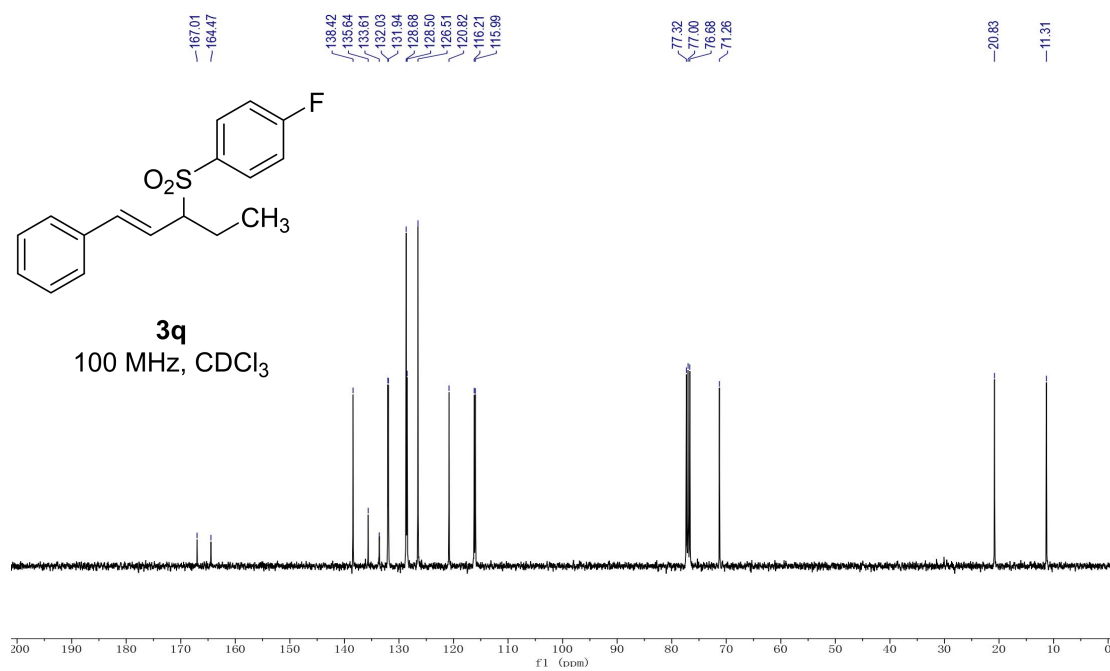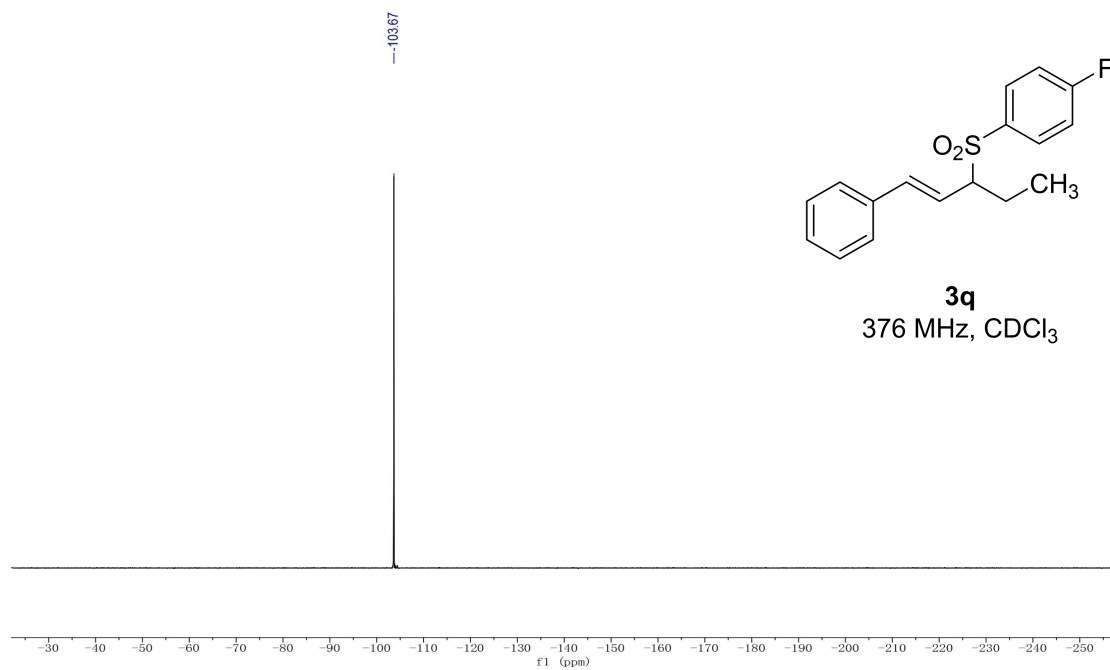

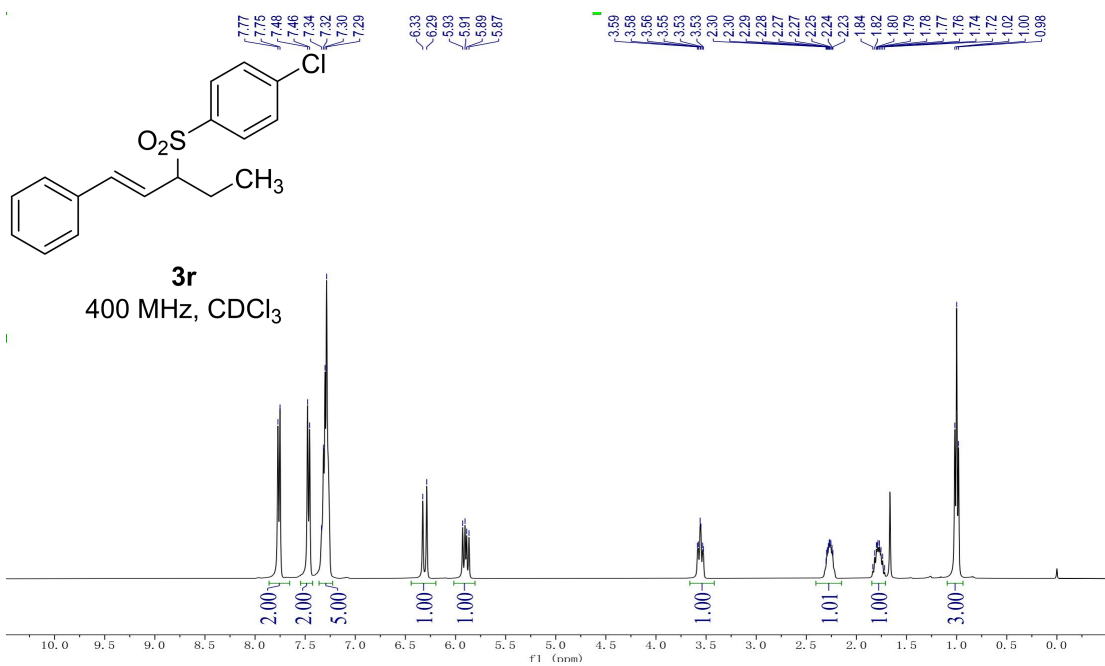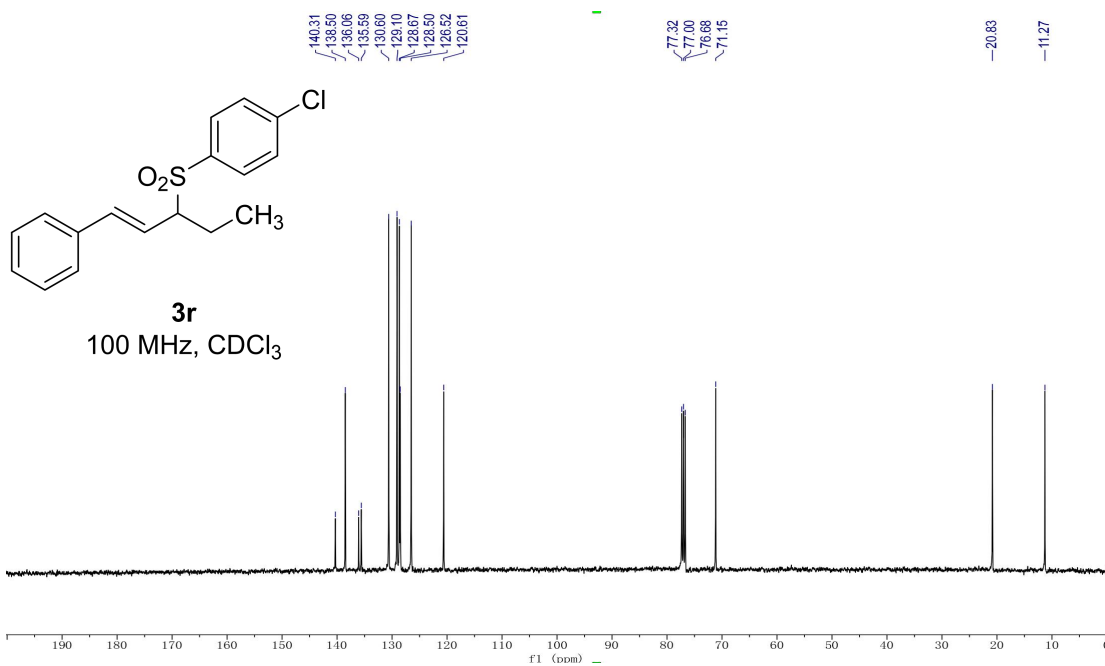

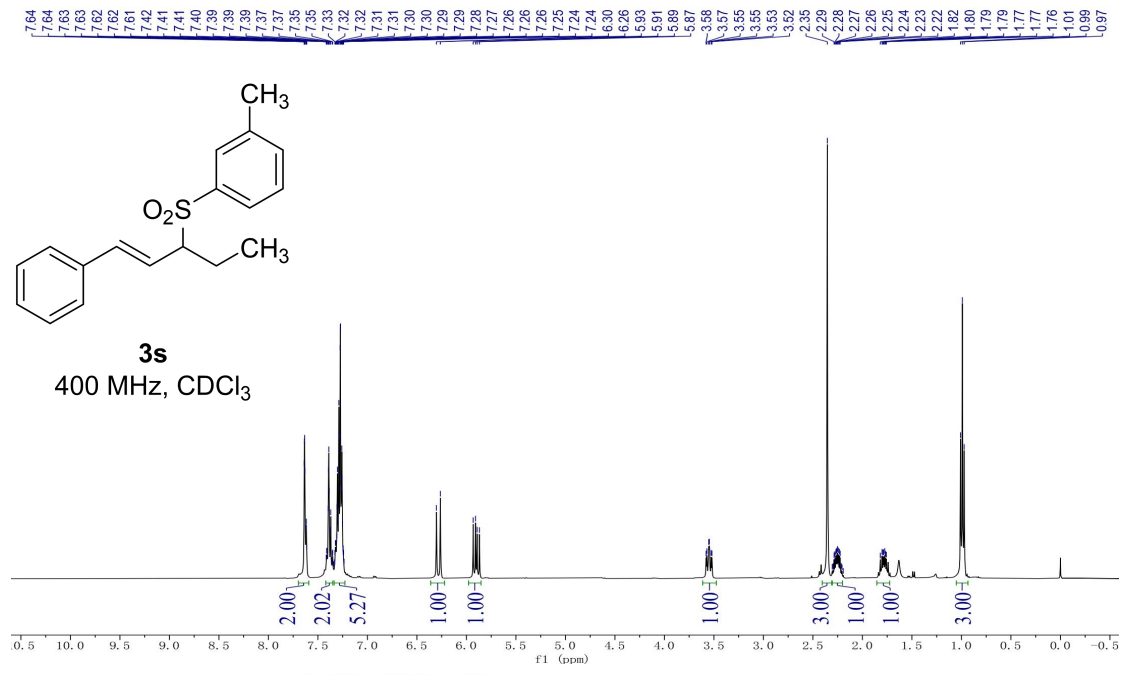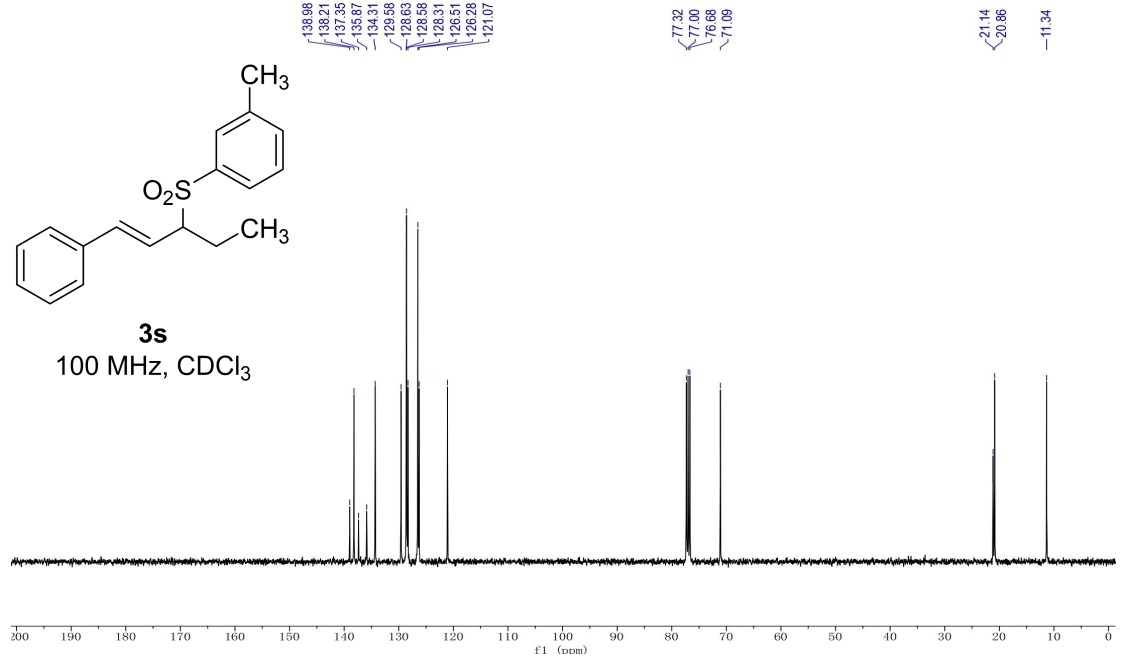

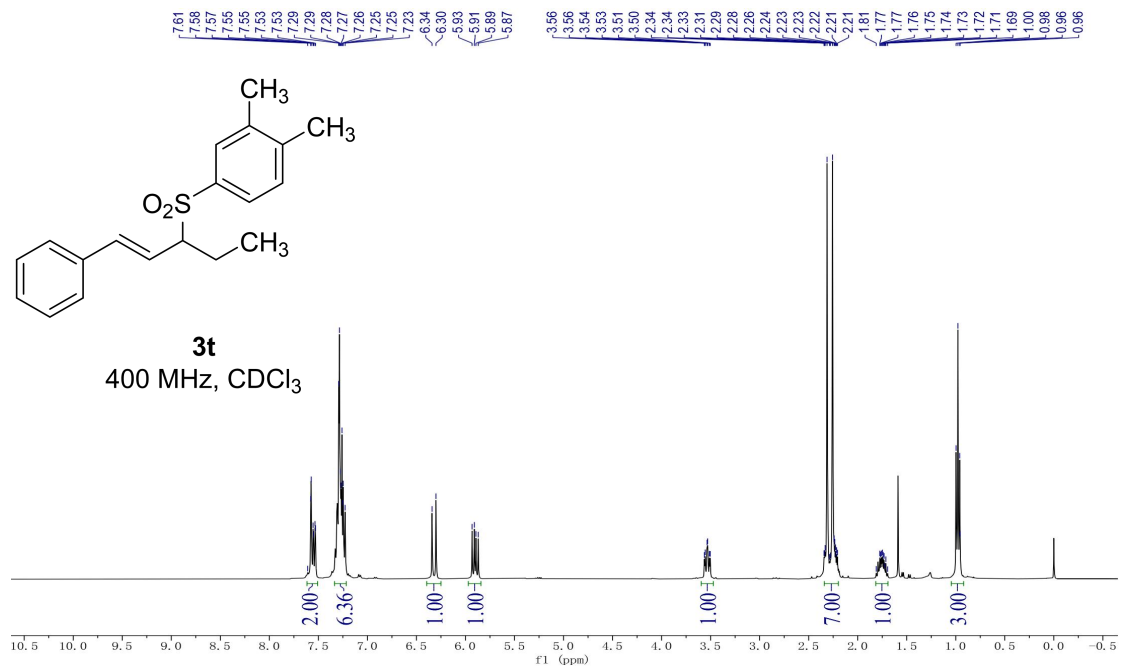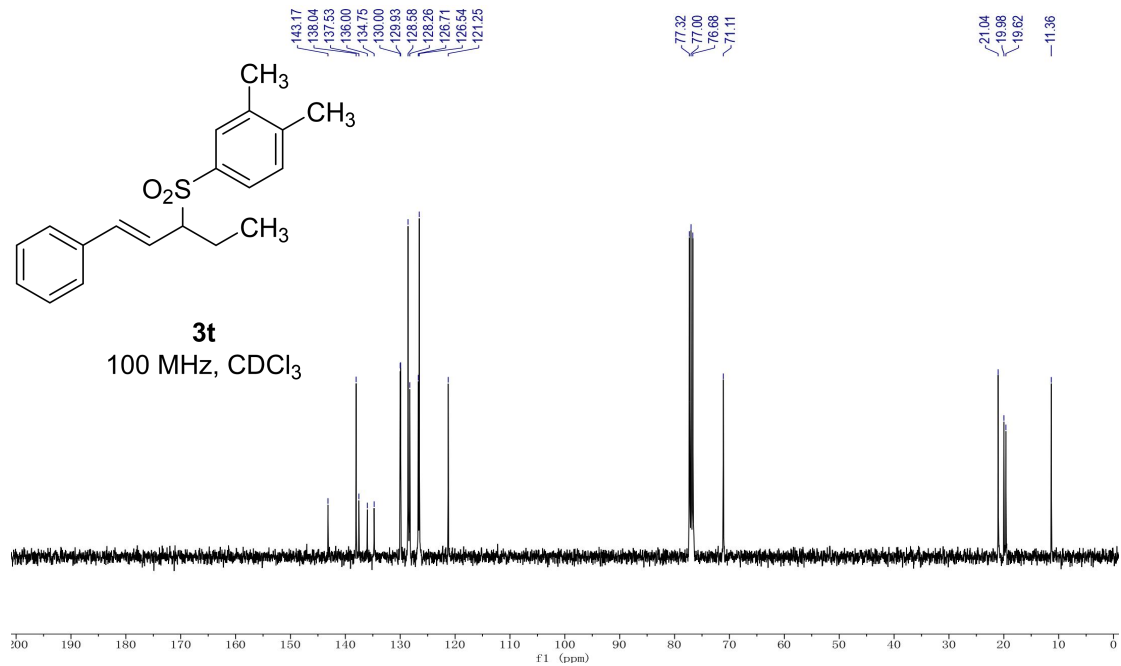

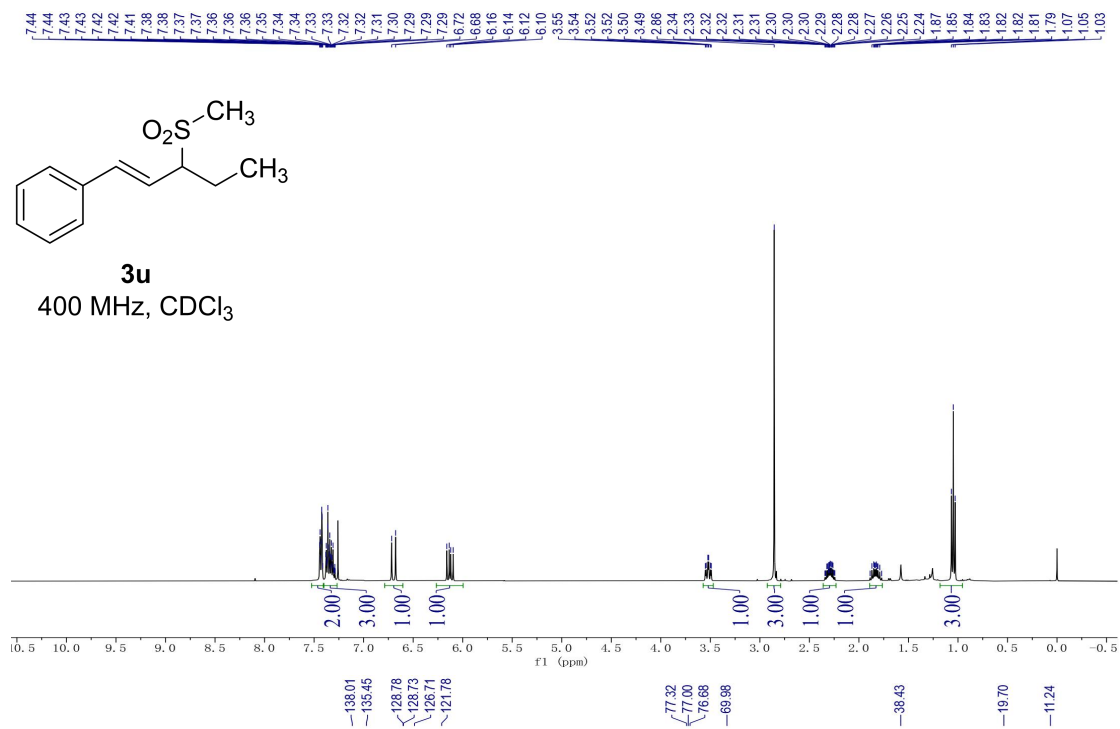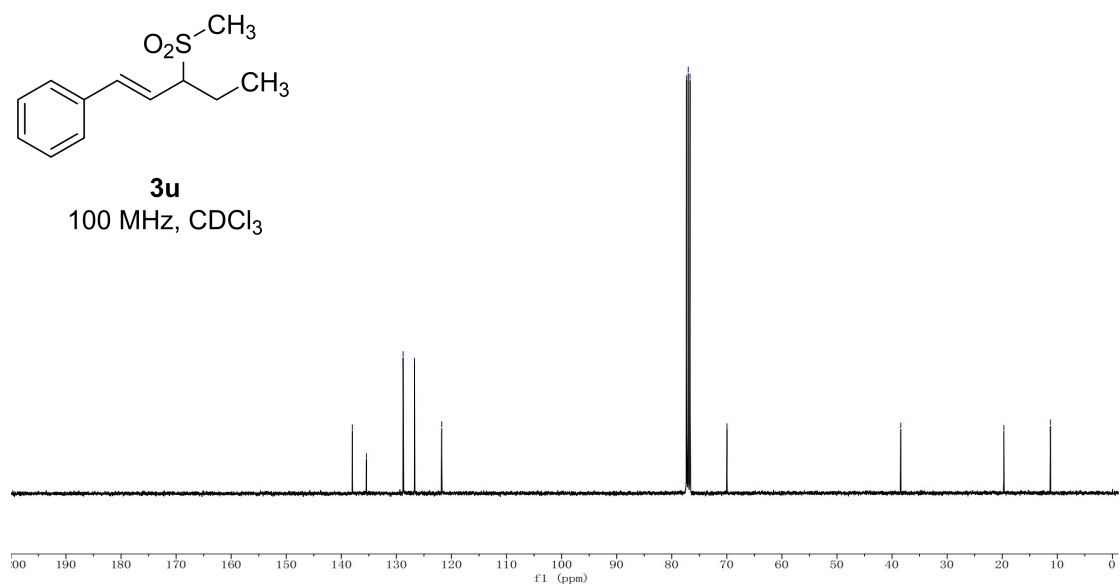

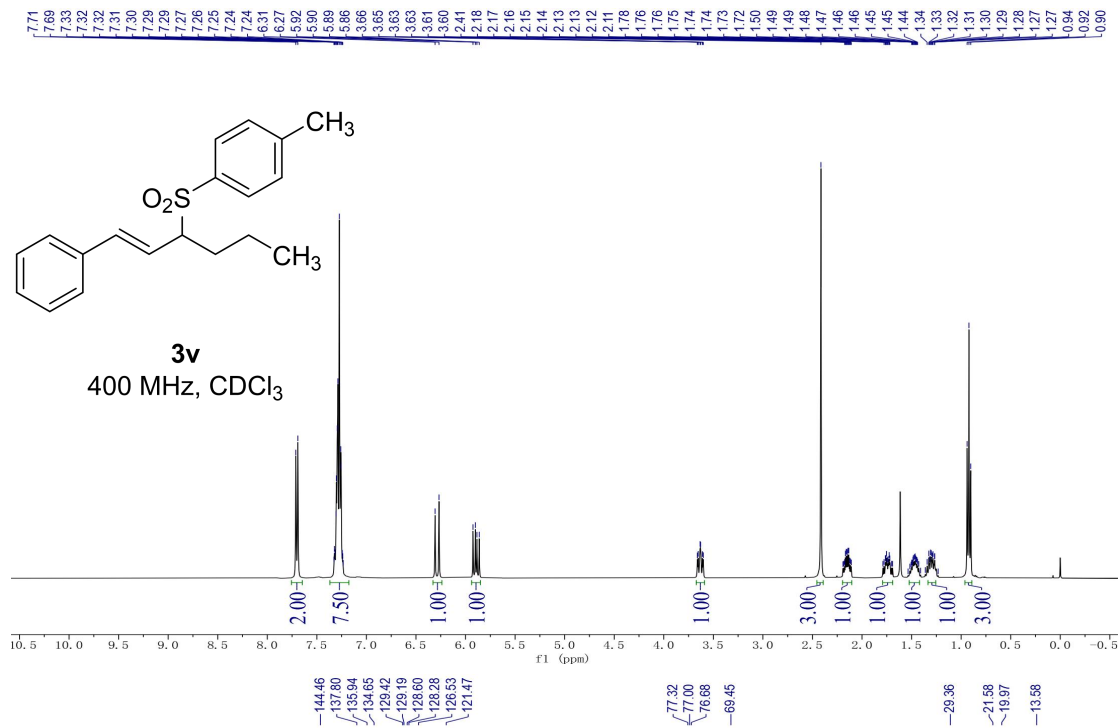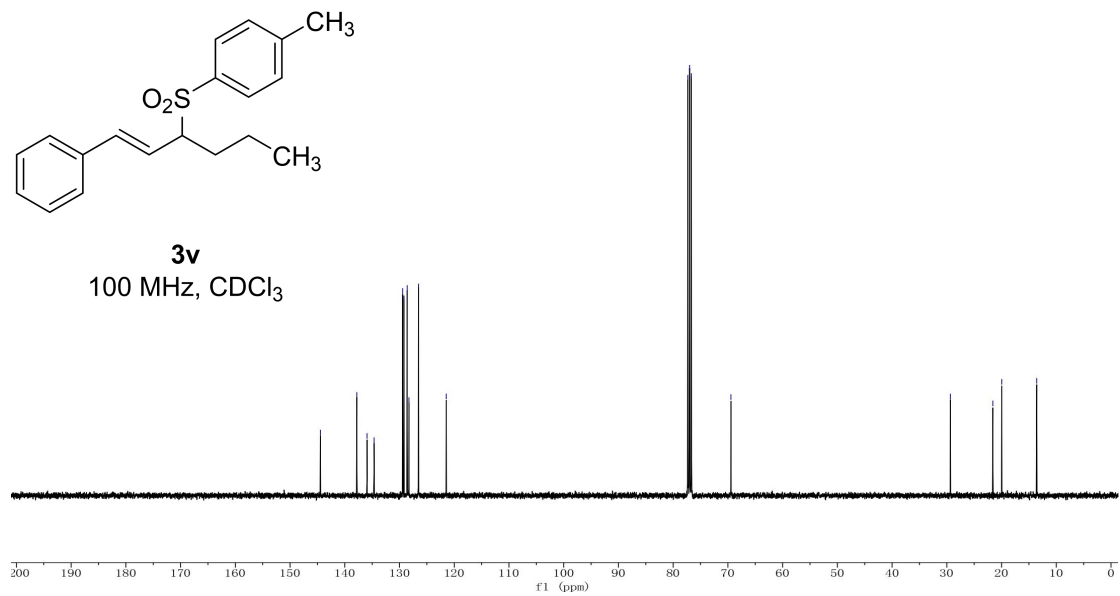

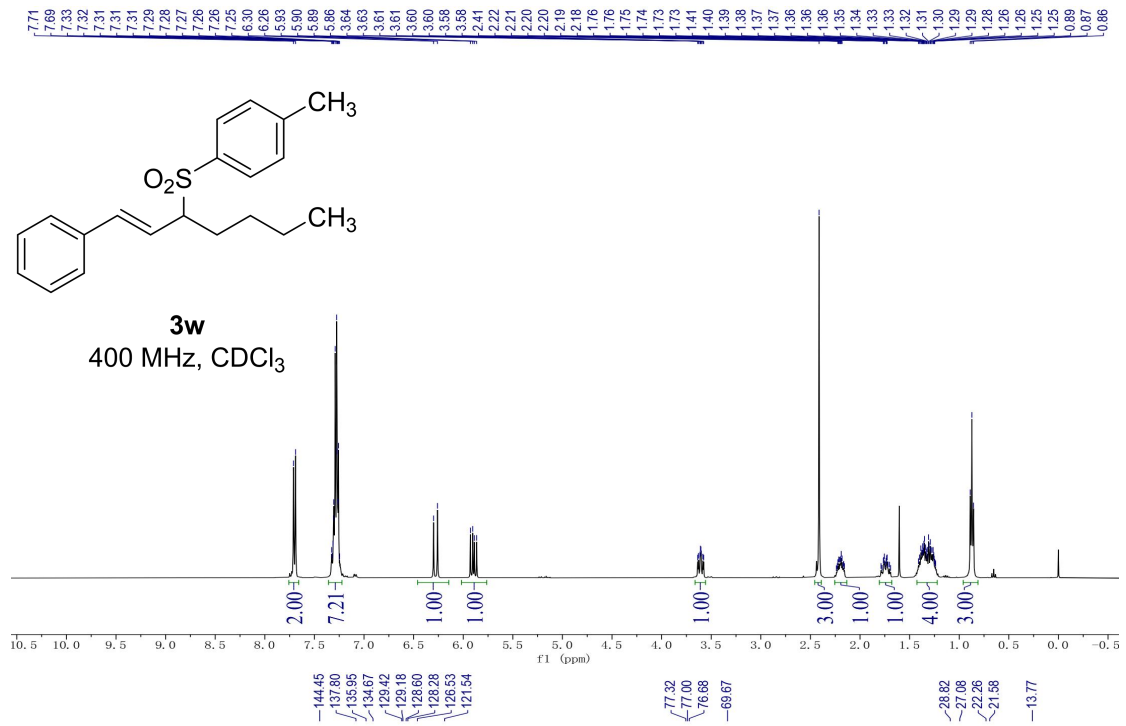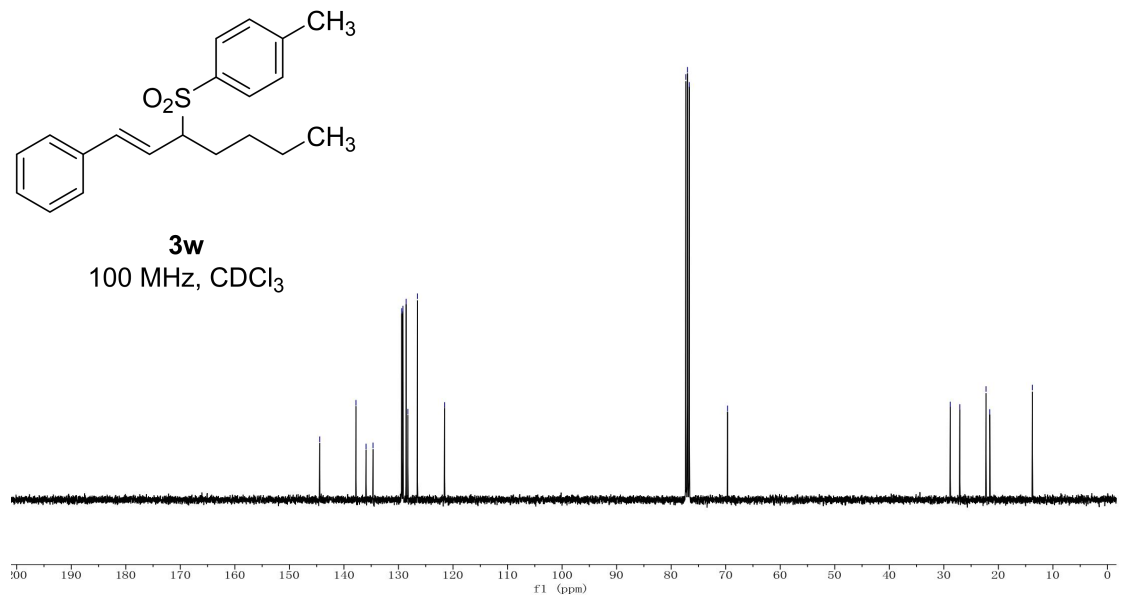

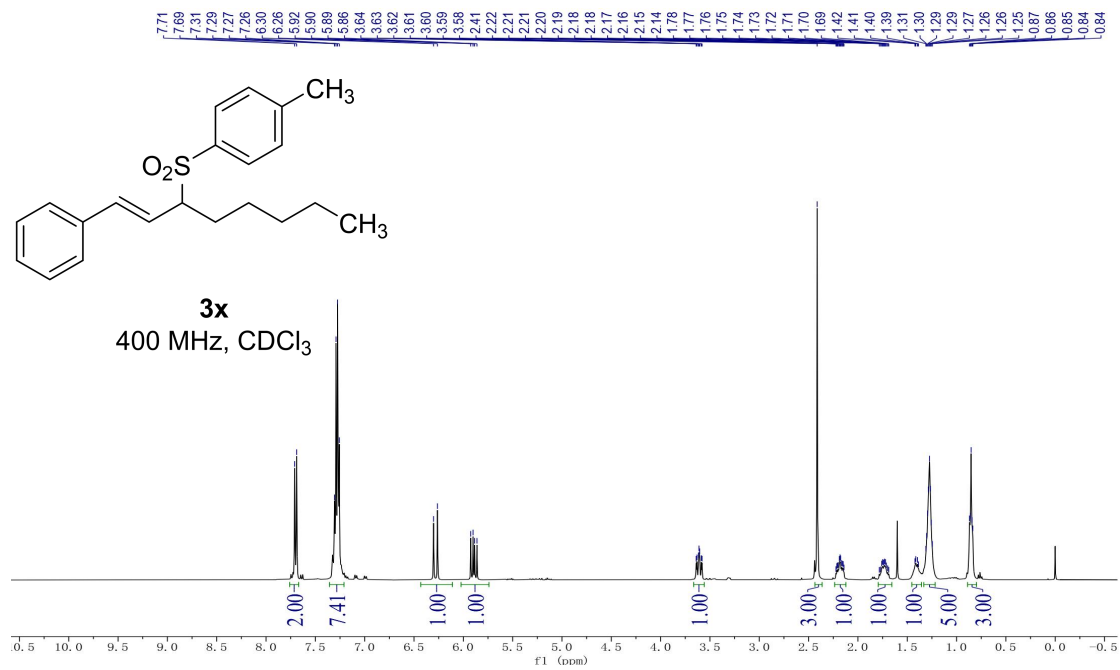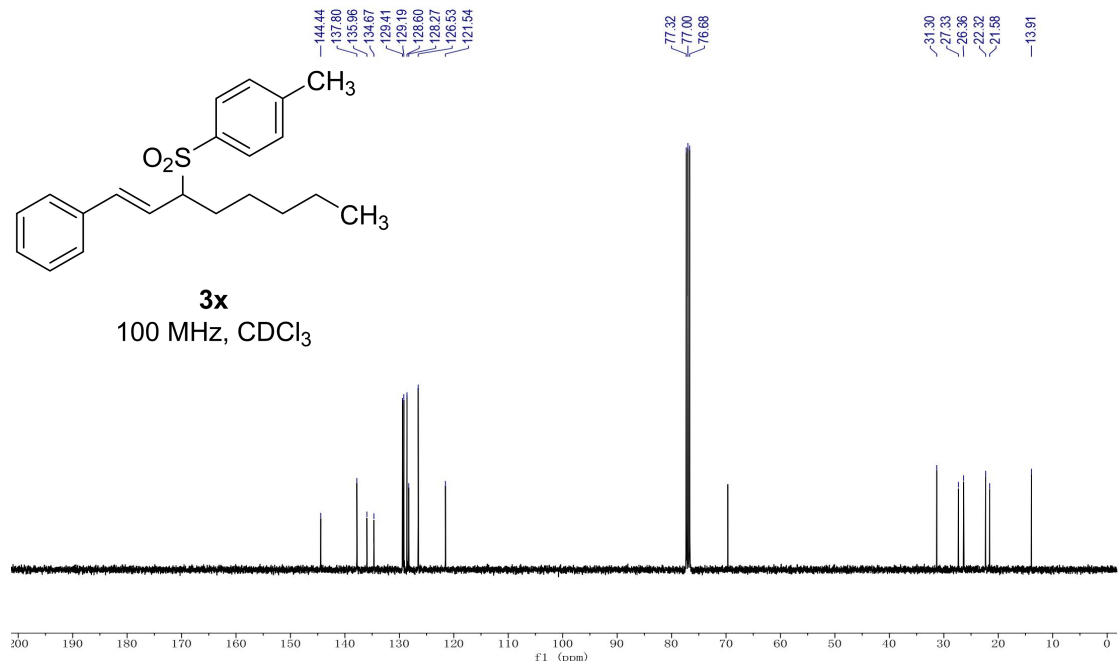

Supplement: d6ob00512h1.pdf [file d6ob00512h1.pdf]
